# Supplementary material for: Investigating the landscape of US orphan product approvals
Source: Orphanet J Rare Dis. 2018 Oct 22;13:183. doi: 10.1186/s13023-018-0930-3 (PMC6198498; doi:10.1186/s13023-018-0930-3)
Supplement: Supplementary file 1 — Appendix: Approved Orphan Products Dataset. (XLSX 92 kb) [file 13023_2018_930_MOESM1_ESM.xlsx]

## Sheet: Sheet1
Trade Name	Generic Name	Orphan Designation	Orphan Drug Indication Approval Date	Orphan Approval Year	Regulatory Category	Approved Indication	Therapeutic Area	Priority Review	Drug Biologic
Luveris	luteinizing hormone (Recombinant human)	For use in association with recombinant human follicle stimulating hormone for the treatment of women with chronic anovulation due to hypogonadotropic hypogonadism.	2004-10-08	2004	New Formulation or Route of Administration	Luveris (lutropin alfa for injection), concomitantly administered with Gonal-f (follitropin alfa for injection), is indicated for stimulation of follicular development in infertile hypogonadotropic hypogonadal women with profound LH deficiency (LH (less t	Reproductive	S	drug
Cayston	aztreonam	Inhalation therapy for control of gram-negative bacteria in the respiratory tract of patients with cystic fibrosis	2010-02-22	2010	New Formulation or Route of Administration	To improve respiratory symptoms in cystic fibrosis (CF) patients with Pseudomonas aeruginosa	Infectious Disease	S	drug
Norditropin	Somatropin [rDNA]	1. Treatment of growth failure in children due to inadequate growth hormone secretion 2. Treatment of short stature associated with Turner's syndrome	2000-06-20	2000	New Formulation or Route of Administration	Long-term treatment of children who have growth failure due to inadequate secretion of endogenous growth hormone.	Metabolism and Endocrinology	S	biologic
Rifater	Rifampin, isoniazid, pyrazinamide	For the short-course treatment of tuberculosis.	1994-05-31	1994	New Formulation or Route of Administration	Short-course treatment of tuberculosis.	Infectious Disease	S	drug
Rifadin I.V.	Rifampin	For antituberculosis treatment where use of the oral form of the drug is not feasible.	1989-05-25	1989	New Formulation or Route of Administration	Initial treatment and retreatment of tuberculosos when drug cannot be taken orally	Infectious Disease	n/a	drug
Nutropin Depot	Somatropin [rDNA]	Long-term treatment of children who have growth failure due to a lack of adequate endogenous growth hormone secretion.	1999-12-22	1999	New Formulation or Route of Administration	Long-term treatment of growth failure due to a lack of adequate endogenous growth hormone secetion for once- or twice-a-month administration.	Metabolism and Endocrinology	P	biologic
So-Aqueous	sotalol (IV)	For ventricular tachycardia, ventricular fibrillation, or the maintenance of sinus rhythm in patients converted from atrial fibrillation or atrial flutter when oral administration is not possible.	2009-07-02	2009	New Formulation or Route of Administration	For use as a substitute for oral sotalol in patients who are unable to take sotalol orally [oral sotalol is indicated for maintenance of normal sinus rhythm in patients with history of highly symptomatic atrial fibrillation /flutter, and for treatment of	Cardiovascular	S	drug
Fusilev	Levoleucovorin	For use in conjunction with high-dose methotrexate in the treatment of osteosarcoma.	2008-03-07	2008	New Formulation or Route of Administration	Levoleucovorin rescue is indicated after high-dose methotrexate therapy in osteosarcoma. Levoleucovorin is also indicated to diminish the toxicity and counteract the effects of impaired methotrexate elimination and of inadvertent overdosage of folic acid	Oncology	S	drug
Aloprim	Allopurinol sodium	Management of patients with leukemia, lymphoma, and solid tumor malignancies who are receiving cancer therapy which causes elevations of serum and urinary uric acid levels and who cannot tolerate oral therapy.	1996-05-17	1996	New Formulation or Route of Administration	Management of patients with leukemia, lymphoma, and solid tumor malignancies who are receiving cancer therapy which causes elevations of serum and urinary uric acid levels and who cannot tolerate oral therapy.	Oncology	P	drug
Infumorph	Morphine sulfate concentrate (preservative free)	For use in microinfusion devices for intraspinal administration in the treatment of intractable chronic pain.	1991-07-19	1991	New Formulation or Route of Administration	For intrathecal or epidural infusion in the treatment of tractable chronic pain. It was developed for use in continuous microinfusion devices and may require dilution before use as directed.	Analgesia	n/a	drug
Cetylev	acetylcysteine effervescent tablets for oral solution	Preventing hepatic injury from acetaminophin overdose	2016-01-29	2016	New Formulation or Route of Administration	Indicated to prevent or lessen hepatic injury after ingestion of a potentially hepatotoxic quantity of acetaminophen in patients with acute ingestion or from repeated supratherapeutic ingestion	Antidotes and Medical Countermeasures	S	drug
Rebetol	ribavirin (oral solution)	Treatment of chronic hepatitis C in pediatric patients	2003-07-29	2003	New Formulation or Route of Administration	Treatment of chronic hepatitis C among previously untreated pediatric patients at least three years of age or older.	Infectious Disease	P	drug
phoxilium	phoxilium	For use as a replacement solution in patients undergoing continuous renal replacement therapy	2015-01-13	2015	New Formulation or Route of Administration	As a replacement solution in Continuous Renal Replacement Therapy (CRRT) and in case of drug poisoning when CRRT is used to remove dialzable substances	Renal	S	drug
Cordarone	Amiodarone HCl	For the acute treatment and prophylaxis of life-threatening ventricular tachycardia or ventricular fibrillation.	1995-08-03	1995	New Formulation or Route of Administration	For initiation of treatment and prophylaxis of frequently recurring ventricular fibrillation and hemodynamically unstable ventricular tachycardia in patients refractory to other therapy.	Cardiovascular	S	drug
Ambisome	amphotericin B (Liposomal)	Treatment of cryptococcal meningitis.	1997-08-11	1997	New Formulation or Route of Administration	Treatment of disseminated cryptococcosis including meningitis.	Infectious Disease	P	drug
Sandostatin Lar	Octreotide	Treatment of severe diarrhea and flushing associated with malignant carcinoid tumors.	1998-11-25	1998	New Formulation or Route of Administration	Supression of severe diarrhea and flushing associated with malignant carcinoid syndrome.	Gastroenterology	P	drug
Sandostatin Lar	Octreotide	Treatment of diarrhea associated with vasoactive intestinal peptide tumors (VIPoma).	1998-11-25	1998	New Formulation or Route of Administration	Treatment of profuse watery diarrhea associated with VIPoma.	Gastroenterology	P	drug
Sandostatin Lar	Octreotide	Treatment of acromegaly.	1998-11-25	1998	New Formulation or Route of Administration	Reduction of growth hormone and IGF-1 (somatomedin C) in acromegaly.	Metabolism and Endocrinology	P	drug
Triostat	Liothyronine sodium injection	Treatment of myxedema coma/precoma.	1991-12-31	1991	New Formulation or Route of Administration	Treatment of myxedema coma/precoma.	Metabolism and Endocrinology	n/a	drug
Marqibo	vinCRIStine sulfate LIPOSOME injection	Treatment of acute lymphoblastic leukemia	2012-08-09	2012	New Formulation or Route of Administration	Treatment of adult patients with Philadelphia chromosome-negative (Ph-) acute lymphoblastic leukemia (ALL) in second or greater relapse or whose disease has progressed following two or more anti-leukemia therapies.	Oncology	S	drug
Norvir	Ritonavir powder for oral suspension	Use with other antiretroviral agents for the treatment of pediatric HIV-1 infection	2017-06-07	2017	New Formulation or Route of Administration	indicated in combination with other antiretroviral agents for the treatment of pediatric patients with HIV-1 infection	Infectious Disease	P	drug
Rituxan Hycela	rituximab and recombinant human hyaluronidase	Treatment of follicular lymphoma	2017-06-22	2017	New Formulation or Route of Administration	Treatment of adult patients with relapsed or refractory, follicular lymphoma as a single agent, previously untreated follicular lymphoma in combination with first line chemotherapy and, in patients achieving a complete or partial response to rituximab in	Oncology	S	biologic
Rituxan Hycela	rituximab and recombinant human hyaluronidase	Treatment of diffuse large B-cell lymphoma	2017-06-22	2017	New Formulation or Route of Administration	Treatment of adult patients with previously untreated diffuse large B-cell lymphoma in combination with cyclophosphamide, doxorubicin, vincristine, prednisone (CHOP) or other anthracycline-based chemotherapy regimens	Oncology	S	biologic
Rituxan Hycela	rituximab and recombinant human hyaluronidase	Treatment of chronic lymphocytic leukemia (CLL)	2017-06-22	2017	New Formulation or Route of Administration	Treatment of adult patients with previously untreated and previously treated CLL in combination with fludarabine	Oncology	S	biologic
Exjade; Jadenu Sprinkles	Deferasirox	Treatment of chronic iron overload in patients with transfusion-dependent anemias	2017-05-18	2017	New Formulation or Route of Administration	treatment of chronic iron overload due to blood transfusions (transfusional hemosiderosis) in patients 2 years of age and older	Hematology	S	drug
Exjade; Jadenu Sprinkles	deferasirox	Treatment of chronic iron overload in alpha-thalassemia	2017-05-18	2017	New Formulation or Route of Administration	Treatment of chronic iron overload in patients 10 years of age and older with non-transfusion-dependent thalassemia (NTDT) syndromes and with a liver iron concentration (LIC) of at least 5 milligrams of iron per gram of liver dry weight (mg Fe/g dw) and a	Hematology	S	drug
Steritalc	Sterile talc	Treatment of malignant pleural effusion	2017-05-01	2017	New Formulation or Route of Administration	To decrease the recurrence of malignant pleural effusions in symptomatic patients following maximal drainage of the pleural effusion.	Oncology	S	drug
Paser Granules	Aminosalicylic acid	Treatment of tuberculosis infections	1994-06-30	1994	New Formulation or Route of Administration	Treatment of tuberculosis	Infectious Disease	S	drug
Xatmep	methotrexate oral solution	Management of pediatric patients with active polyarticular juvenile idiopathic arthritis (pJIA) who are intolerant of or had an inadequate response to first-line therapy.	2017-04-25	2017	New Formulation or Route of Administration	Treatment of oligoarticular juvenile idiopathic arthritis (persistent oligoarthritis, psoriatic juvenile idiopathic arthritis, enthesitis-related arthritis, or undifferentiated arthritis) and polyarticular juvenile idiopathic arthritis in children 0 throu	Rheumotology & Immunology	S	drug
Saizen	Somatropin [rDNA]	Treatment of idiopathic or organic growth hormone deficiency in children with growth failure.	1996-10-08	1996	New Formulation or Route of Administration	Long term treatment of children with growth failure due to inadequate secretion of endogenous growth hormone.	Metabolism and Endocrinology	S	biologic
Metrodin	Urofollitropin	For induction of ovulation in patients with polycystic ovarian disease who have an elevated LH/FSH ratio and who have failed to respond to adequate clomiphene citrate therapy.	1986-09-18	1986	New Formulation or Route of Administration	induction of ovulation in patients with polycystic ovarian disease who have an elevated LH/FSH ratio and who have failed to respond to adequate clomiphene citrate therapy	Reproductive	n/a	drug
Tyvaso	treprostinil (inhalational)	Treatment of pulmonary arterial hypertension	2009-07-30	2009	New Formulation or Route of Administration	Treatment of pulmonary arterial hypertension (WHO Group I) in patients with NYHA Class III symptoms, to increase walk distance	Cardiovascular	S	drug
Tobi	Tobramycin for inhalation	Treatment of bronchopulmonary infections of Pseudomonas aeruginosa in cystic fibrosis patients.	1997-12-22	1997	New Formulation or Route of Administration	Management of cystic fibrosis patients with P.aeruginosa.	Infectious Disease	P	drug
Envarsus Xr	tacrolimus	Prophylaxis of organ rejection in patients receiving allogeneic kidney transplant	2015-07-10	2015	New Formulation or Route of Administration	Prophylaxis of organ rejection in kidney transplant patients converted from tacrolimus immediate-release formulations in combination with other immunosuppressants	Transplant	S	drug
Nutropin	Somatropin [rDNA]	Treatment of growth retardation associated with chronic renal failure.	1993-11-17	1993	New Formulation or Route of Administration	Treatment of children with growth failure associated with chronic renal insufficency.	Metabolism and Endocrinology	S	biologic
Humatrope	Somatropin [rDNA]	For the long-term treatment of children who have growth failure due to inadequate secretion of normal endogenous growth hormone.	1987-03-08	1987	New Formulation or Route of Administration	treatment of growth failure in children with GH deficiency	Metabolism and Endocrinology	n/a	biologic
Acetadote	acetylcysteine	For the intravenous treatment of moderate to severe acetaminophen overdose	2004-01-23	2004	New Formulation or Route of Administration	For the use of Acetadote(registered TM) Injection, administered intravenously within 8 to 10 hours after ingestion of a potentially heptotoxic quantity of acetaminophen, to prevent or lessen hepatic injur	Antidotes and Medical Countermeasures	P	drug
Xatmep	methotrexate oral solution	Treatment of acute lymphoblastic leukemia in pediatric patients (0 through 16 years of age)	2017-04-25	2017	New Formulation or Route of Administration	Treatment of pediatric patients with acute lymphoblastic leukemia (ALL) as a component of a combination chemotherapy maintenance regimen	Oncology	S	drug
Subutex	Buprenorphine hydrochloride	Treatment of opiate addiction in opiate users.	2002-10-08	2002	New Formulation or Route of Administration	Treatment of opioid dependence in patients 16 years of age or older	Addiction	S	drug
Retisert	Fluocinolone	Treatment uveitis involving the posterior segment of the eye.	2005-04-08	2005	New Formulation or Route of Administration	Treatment of chronic non-infectious uveitis affecting the posterior segment of the eye	Ophthalmology	P	drug
Gralise	gabapentin	Management of postherpetic neuralgia	2011-01-28	2011	New Formulation or Route of Administration	For the management of postherpetic neuralgia	Analgesia	S	drug
Vitrasert	Ganciclovir intravitreal implant	Treatment of cytomegalovirus retinitis.	1996-03-04	1996	New Formulation or Route of Administration	Treatment of CMV retinitis in patients with acquired immunodeficiency syndrome.	Ophthalmology	P	drug
Daunoxome	Daunorubicin citrate liposome injection	Treatment of patients with advanced HIV-associated Kaposi's sarcoma.	1996-04-08	1996	New Formulation or Route of Administration	First line cytotoxic therapy for advanced, HIV related Kaposi's sarcoma.	Oncology	P	drug
Secreflo	Synthetic porcine secretin	For use in the diagnosis of gastrinoma associated with Zollinger-Ellison syndrome.	2002-04-04	2002	New Formulation or Route of Administration	Use in secretin stimulation testing for stimulation of gastrin secretion to aid in the diagnosis of gastrinoma	Gastroenterology	P	drug
Duraclon	Clonidine	For continous epidural administration as adjunctive therapy with intraspinal opiates for the treatment of pain in cancer patients tolerant to, or unresponsive to, intraspinal opiates.	1996-10-02	1996	New Formulation or Route of Administration	In combination with opiates for the treatment of severe pain in cancer patients that is not adequately relieved by opioid analgesics alone.	Analgesia	S	drug
Vermox	mebendazole	Treatment of single or mixed gastrointestinal infestations by Trichuris trichiura (whipworm), Ascaris lumbricoides (large roundworm), and Ancylostoma duodenale and Nectar americanus (hookworm).	2016-10-19	2016	New Formulation or Route of Administration	treatment of patients one year of age and older withgastrointestinal infections caused by Ascaris lumbricoides (roundworm) and Trichuris trichiura (whipworm)	Infectious Disease	P	drug
Ryanodex	dantrolene sodium suspension for injection	Treatment of malignant hyperthermia syndrome	2014-07-22	2014	New Formulation or Route of Administration	Treatment of malignant hyperthermia in conjunction with appropriate supportive measures and for the prevention of malignant hyperthermia in patients at high risk.	Anesthesia	P	drug
Duopa	Levodopa and carbidopa	Treatment of late stage Parkinson's disease	2015-01-09	2015	New Formulation or Route of Administration	Treatment of motor flucuations in patients with advanced Parkinson's disease	Neurology	S	drug
Oforta	Fludarabine phosphate oral tablets	Treatment of B-cell chronic lymphocytic leukemia	2008-12-18	2008	New Formulation or Route of Administration	Treatment of adult patients with B-cell chronic lymphocytic leukemia (CLL) whose disease has not responded to or has progressed during or after treatment with at least one standard alkylating-agent containing regimen	Oncology	S	drug
Lupron Depot-PED	Leuprolide acetate	Treatment of central precocious puberty	1993-04-16	1993	New Formulation or Route of Administration	Treatment of children with central precocious puberty	Metabolism and Endocrinology	S	drug
Valchlor	meclorethamine	Treatment of mycosis fungoides	2013-08-23	2013	New Formulation or Route of Administration	Topical treatment of Stage 1A and 1B mycosis fungoides-type cutaneous T-cell lymphoma in patients who have received prior skin-directed therapy. opical preparations, including mechlorethamine preparations, are recommended for treatment of early stage myco	Oncology	S	drug
Ravicti	glycerol phenylbutyrate	Maintenance treatment of patients with deficiencies in enzymes of the urea cycle	2013-02-01	2013	New Formulation or Route of Administration	Use as a nitrogen-binding adjunctive therapy for chronic management of adult and pediatric patients at least 2 years of age with urea cycle disorders (UCDs) that cannot be managed by dietary protein restriction and/or amino acid supplementation alone. RAV	Metabolism and Endocrinology	S	drug
Lutrepulse	Gonadorelin acetate	For induction of ovulation in women with hypothalamic amenorrhea due to a deficiency or absence in the quantity or pulse pattern of endogenous GnRH secretion.	1989-10-10	1989	New Formulation or Route of Administration	treatment of infertility in women with hypothalamic amenorrhea	Reproductive	n/a	drug
Supprelin LA	Histrelin acetate	Treatment of central precocious puberty	2007-05-03	2007	New Formulation or Route of Administration	Treatment of central precocious puberty	Metabolism and Endocrinology	S	drug
Lioresal	baclofen	Treatment of intractable spasticity caused by spinal cord injury, multiple sclerosis, and other spinal diseases (including spinal ischemia, spinal tumor, transverse myelitis, cervical spondylosis, and degenerative myelopathy).	1992-06-25	1992	New Formulation or Route of Administration	Management of severe spasticity of spinal cord origin in patients who are unresponsive to oral baclofen therapy or experience intolerable CNS side effects at effective doses.	Neurology	n/a	drug
Depocyt	Cytarabine liposomal	Treatment of neoplastic meningitis.	1999-04-01	1999	New Formulation or Route of Administration	Intrathecal treatment of lymphomatous meningitis.	Oncology	P	drug
Suboxone	buprenorphine in combination with naloxone	Treatment of opiate addiction in opiate users	2002-10-08	2002	New Formulation or Route of Administration	Treatment of opioid dependence in patients 16 years of age or older	Addiction	P	drug
Busulfex	Busulfan	As preparative therapy in the treatment of malignancies with bone marrow transplantation.	1999-02-04	1999	New Formulation or Route of Administration	For use in combination with cyclophosphamide as a conditioning regimen prior to allogeneic hematopoietic progenitor cell transplantation for chronic myelogenous leukemia.	Oncology	P	drug
Carnexiv	carbamazepine, intravenous	Treatment of epilepsy patients who cannot take anything by mouth (NPO)	2016-10-07	2016	New Formulation or Route of Administration	Replacement therapy for oral carbamazepine formulations, when oral administration is temporarily not feasible, in adults with the following seizure types: (1) Partial seizures with complex symptomology; (2)Generalized clonic-tonic seizures; and (3) Mixed	Neurology	S	drug
Procysbi	cysteamine enteric coated	Treatment of cystinosis	2013-04-30	2013	New Formulation or Route of Administration	For management of nephropathic cystinosis in adults and children ages 6 years and older	Metabolism and Endocrinology	S	drug
Carnitor	Levocarnitine (oral solution)	Treatment of genetic carnitine deficiency.	1986-04-10	1986	New Formulation or Route of Administration	Treatment of primary systemic carnitine deficiency	Metabolism and Endocrinology	n/a	drug
Ammonul	Benzoate and phenylacetate	Treatment of acute hyperammonemia and associated encephalopathy in patients with deficiencies in enzymes of the urea cycle.	2005-02-17	2005	New Formulation or Route of Administration	Adjunctive therapy in the treatment of acute hyperammonemia and associated encephalopathy in patients with deficiencies in enzymes of the urea cycle.	Metabolism and Endocrinology	P	drug
Diastat	Diazepam viscous solution for rectal administration	For the management of selected, refractory, patients with epilepsy, on stable regimens of antiepileptic drugs (AEDs), who require intermittent use of diazepam to control bouts of increased seizure activity.	1997-07-29	1997	New Formulation or Route of Administration	management of selected, refractory, patients with epilepsy, on stable regimens of antiepileptic drugs (AEDs), who require intermittent use of diazepam to control bouts of increased seizure activity	Neurology	S	drug
Orfadin	Nitisinone (oral suspension)	Treatment of tyrosinemia type 1.	2016-04-22	2016	New Formulation or Route of Administration	Treatment of hereditary tyrosinemia type 1 in combination with dietary restriction of tyrosine and phenylalanine.	Metabolism and Endocrinology	S	drug
Bendeka	bendamustine for 50 ml admixture	Treatment of chronic lymphocytic leukemia	2015-12-07	2015	New Formulation or Route of Administration	Treatment of patients with CLL and treatment of patients with indolent B-cell NHL	Oncology	S	drug
Bendeka	bendamustine for 50 ml admixture	Treatment of Follicular Lymphoma, Small Lymphocytic Lymphoma, Lymphoplasmacytic Lymphoma, Splenic Marginal Zone Lymphoma, Extranodal Marginal Zone B-cell Lymphoma of Mucosa-Associated Lymphoma Tissue (MALT), and Nodal Marginal Zone Lymphoma (Collectively	2015-12-07	2015	New Formulation or Route of Administration	Treatment of patients with CLL and treatment of patients with indolent B-cell NHL	Oncology	S	drug
Nymalize	nimodipine	Treatment of subarachnoid hemorrhage.	2013-05-10	2013	New Formulation or Route of Administration	Improvement of neurological outcome by reducing the incidence and severity of ischemic deficits in adult patients with subarachnoid hemorrhage (SAH) from ruptured intracranial berry aneurysms regardless of their post-ictus neurological condition (i.e., Hu	Neurology	P	drug
Stimate	Desmopressin acetate	Treatment of mild hemophilia A and von Willebrand's disease.	1994-03-07	1994	New Formulation or Route of Administration	Treatment of patients with hemophilia A or von Willebrand's disease (type I) whose factor VIII coagulant activity level is greater than 5%.	Hematology	S	drug
Evomela	melphalan	High dose conditioning treatment prior to hematopoietic progenitor (stem) cell transplantation	2016-03-10	2016	New Formulation or Route of Administration	for high-dose conditioning treatment prior to hematopoietic progenitor (stem) cell transplantation in patients with multiple myeloma	Hematology	S	drug
Purixan	mercaptopurine oral solution	Treatment of acute lymphoblastic leukemia in pediatric patients	2014-04-28	2014	New Formulation or Route of Administration	Treatment of patients with acute lymphoblastic leukemia as part of a combination regimen.	Oncology	S	drug
Alkeran	Melphalan (IV)	Treatment of patients with multiple myeloma for whom oral therapy is inappropriate.	1992-11-18	1992	New Formulation or Route of Administration	For the palliative treatment of patients with multiple myeloma for whom oral melphalan is not appropriate.	Oncology	P	drug
Megace	Megestrol acetate	Treatment of patients with anorexia, cachexia, or significant weight loss (=/>10% of baseline body weight) and confirmed diagnosis of AIDS.	1993-09-10	1993	New Formulation or Route of Administration	Treatment of anorexia, cachexia, or an unexplained significant weight loss in patients with a diagnosis of acquired immune deficiency syndrome.	Metabolism and Endocrinology	S	drug
Secreflo	Synthetic porcine secretin	For use in conjunction with diagnostic, therapeutic, or combined diagnostic/therapeutic procedures for pancreatic disorders to increase pancreatic fluid secretion.	2002-04-04	2002	New Formulation or Route of Administration	Use in secretin stimulation testing for stimulation of pancreatic secretions, including bicarbonate, to aid in the diagnosis of pancreatic exocrine dysfunction	Gastroenterology	S	drug
Novoseven	Coagulation factor VIIa (recombinant)	Prevention of bleeding episodes in patients with hemophilia A or B, with or without inhibitors	2005-08-12	2005	Secondary Indication	Prevention of bleeding in surgical interventions or invasive procedures in hemophilia A or B patients with inhibitors to Factor VIII or Factor IX	Hematology	S	biologic
Novoseven	Coagulation Factor VIIa (Recombinant)	Treatment of bleeding episodes in patients with acquired inhibitors to Factor VIII or Factor IX	2006-10-13	2006	Secondary Indication	Treatment of bleeding episodes in surgical interventions or invasive procedures in patients with acquired hemophilia	Hematology	S	biologic
Novoseven	Coagulation factor VIIa (recombinant)	Treatment of bleeding episodes in patients with congenital factor VII deficiency	2005-07-11	2005	Secondary Indication	Treatment of bleeding episodes in patients with Factor VII Deficiency	Hematology	S	biologic
Cytogam	Cytomegalovirus immune globulin (human)	Prevention or attenuation of primary cytomegalovirus disease in immunosuppressed recipients of organ transplants.	1998-12-04	1998	Secondary Indication	#1) Attenuation of primary CMV disease associated with kidney transplant recipients who are seronegative for CMV and who receive a kidney from a CMV seropositve donor; #2) Prophylaxis of CMV disease associated transplantation of kidney (all other), lung,	Transplant	unknown	biologic
Novoseven	Coagulation factor VIIa (recombinant)	Prevention of bleeding episodes in patients with congenital Factor VII deficiency	2005-07-11	2005	Secondary Indication	Prevention of bleeding in surgical interventions or invasive procedures in patients with congenital F VII deficiency	Hematology	S	biologic
Gamimune N	Immune globulin (human)	Infection prophylaxis in pediatric patients affected with the human immunodeficiency virus.	1993-12-27	1993	Secondary Indication	For prophylaxis of children with clinical or immunologic evidence of human immunodeficiency virus to decrease the frequency of serious and minor bacterial infections and the frequency of hospitalization, and to increase the time free of serious bacterial	Infectious Disease	unknown	biologic
Gammagard	immune globulin (human)	Treatment of multifocal motor neuropathy	2012-06-22	2012	Secondary Indication	Maintenance therapy to improve muscle strength and disability in adult patients with Multifocal Motor Neuropathy (MMN).	Neurology	P	biologic
Gammaplex	immune globulin (human)	Treatment of idiopathic thrombocytopenic purpura (also known as primary immune thrombocytopenia)	2013-03-08	2013	Secondary Indication	Idiopathic thrombocytopenic purpura	Hematology	S	biologic
Colazal	Balsalazide disodium	Treatment of pediatric patients with ulcerative colitis	2006-12-20	2006	Secondary Indication	Treatment of mildly to moderately active ulcerative colitis in patients 5 years of age and older. Safety and Effectiveness of Colazal beyond 8 weeks in children (ages 5-17) and 12 weeks in adults have not been established.	Gastroenterology	P	drug
Gamunex-C	Immune Globulin (Human)	Treatment of chronic inflammatory demyelinating polyneuropathy	2008-09-12	2008	Secondary Indication	Treatment of Chronic Inflammatory Demyelinating Polyneuropathy (CIDP) to improve neuromuscular disability and impairment and for maintenance therapy to prevent relapse	Neurology	P	biologic
Corifact	factor XIII concentrate (human)	Treatment of congenital factor XIII deficiency	2013-01-24	2013	Secondary Indication	Peri-operative management of surgical bleeding in adult and pediatric patients with congenital Factor XIII deficiency.	Hematology	S	biologic
Ethyol	Amifostine	Reduction of the incidence of moderate to severe xerostomia in patients undergoing post-operative radiation treatment for head and neck cancer.	1999-06-24	1999	Secondary Indication	Reduction of the incidence of moderate to severe xerostomia in patients undergoing post-operative radiation treatment for head and neck cancer, where the radiation port includes a substantial portion of the parotid glands.	Antidotes and Medical Countermeasures	P	drug
Humira	adalimumab	Treatment of pediatric Crohn's disease.	2014-09-23	2014	Secondary Indication	Reducing signs and symptoms and inducing and maintaining clinical remission in patients 6 years of age and older with moderately to severely active Crohn's disease who have had an inadequate response to corticosteroids or immunomodulators such as azathiop	Gastroenterology	S	biologic
Humira	adalimumab	Treatment of juvenile rheumatoid arthritis	2008-02-21	2008	Secondary Indication	Reducing signs and symptoms of moderately to severely active polyarticular juvenile idiopathic arthritis in patients 4 years of age and older.	Rheumotology & Immunology	S	biologic
Gilotrif	afatinib	Treatment of non-small cell lung cancer with squamous histology.	2016-04-15	2016	Secondary Indication	Treatment of patients with metastatic, squamous, non-small cell lung cancer progressing after platinum-based chemotherapy	Oncology	S	drug
Iressa	gefitinib	Treatment of epidermal growth factor receptor mutation-positive non-small cell lung cancer	2015-07-13	2015	Secondary Indication	For the first-line treatment of patients with metastatic non-small cell lung cancer (NSCLC) whose tumors have epidermal growth factor receptor (EGFR) exon 19 deletions or exon 21 (L858R) substitution mutations as detected by an FDA-approved test	Oncology	S	drug
Mylotarg	Gemtuzumab ozogamicin	Treatment of acute myeloid leukemia	2017-09-01	2017	Secondary Indication	Treatment of newly-diagnosed CD33-positive acute myeloid leukemia in adults and treatment of relapsed or refractory CD33-positive acute myeloid leukemia in adults and in pediatric patients 2 years and older	Oncology	S	biologic
Proleukin	Aldesleukin	Treatment of metastatic melanoma.	1998-01-09	1998	Secondary Indication	Treatment of adults with metastatic melanoma.	Oncology	P	biologic
Alphanate	Antihemophilic factor (human)	Treatment of von Willebrand's disease	2007-01-31	2007	Secondary Indication	For surgical and/or invasive procedures in patients with von Willebrand Disease (VWD) in whom desmopressin is either ineffective or contraindicated. It is not indicated for patients with severe VWD (Type 3) undergoing major surgery	Hematology	S	biologic
Alecensa	alectinib	Treatment of ALK-positive non-small cell lung cancer	2017-11-06	2017	Secondary Indication	Treatment of patients with anaplastic lymphoma kinase (ALK)-positive, metastatic non-small cell lung cancer (NSCLC) as detected by an FDA-approved test, excluding patients who have progressed on or are intolerant to crizotinib	Oncology	P	drug
Novoseven	coagulation factor VIIa (recombinant)	Treatment of bleeding episodes in Glanzmann's thrombasthenia	2014-07-02	2014	Secondary Indication	Treatment of bleeding episodes and peri-operative management in adults and children with Glanzmann's thrombasthenia with refractoriness to platelet transfusions, with or without antibodies to platelets.	Hematology	P	biologic
Abelcet	Amphotericin B lipid complex	Treatment of invasive fungal infections.	1996-10-18	1996	Secondary Indication	Treatment of invasive fungal infections in patients who are refractory to or intolerant of conventional amphotericin B therapy.	Infectious Disease	P	drug
Kineret	anakinra	Treatment of cryopyrin-associated periodic syndromes	2012-12-21	2012	Secondary Indication	Treatment of neonatal-onset multisystem inflammatory disease (NOMID)	Rheumotology & Immunology	P	biologic
Abilify	aripiprazole	Treatment of Tourette's syndrome	2014-12-12	2014	Secondary Indication	Treatment of pediatric patients with Tourette's	Neurology	S	drug
Mepron	Atovaquone	Prevention of Pneumocystis carinii pneumonia (PCP) in high-risk, HIV-infected patients defined by a history of one or more episodes of PCP and/or a peripheral CD4+ (T4 helper/inducer) lymphocyte count less than or equal to 200/mm3.	1999-01-05	1999	Secondary Indication	Prevention of PCP in patients who are intolerant to trimethoprim-sulfamethoxazole.	Infectious Disease	S	drug
Biothrax	Anthrax Vaccine Adsorbed	For post-exposure prophylaxis of anthrax disease resulting from suspected or confirmed Bacillus anthracis exposure	2015-11-23	2015	Secondary Indication	For post-exposure prophylaxis of disease following suspected or confirmed Bacillus anthracis exposure, when administered in conjunction with recommended antibacterial drugs.	Antidotes and Medical Countermeasures	S	biologic
Hepagam B	hepatitis B immune globulin (human)	Prevention of hepatitis B recurrence following orthotopic liver transplant	2007-04-06	2007	Secondary Indication	Prevention of hepatitis B recurrence following liver transplantation in HBsAG-positive liver transplant patients	Transplant	P	biologic
Lynparza	olaparib	Treatment of ovarian cancer	2017-08-17	2017	Secondary Indication	Maintenance treatment of adult patients with recurrent epithelial ovarian, fallopian tube or primary peritoneal cancer, who are in a complete or partial response to platinum-based chemotherapy; and treatment of adult patients with deleterious or suspected	Oncology	P	drug
Roferon A	Interferon alfa-2a (recombinant)	Treatment of AIDS related Kaposi's sarcoma.	1988-11-21	1988	Secondary Indication	Treatment of selected patients with AIDS-related Kaposi's sarcoma.	Oncology	n/a	biologic
Opdivo	nivolumab	Treatment of Stage IIb to IV melanoma [initial orphan approval on 12/22/2014]	2017-12-20	2017	Secondary Indication	Adjuvant treatment of patients with melanoma with involvement of lymph nodes or metastatic disease who have undergone complete resection	Oncology	P	biologic
Abraxane	paclitaxel protein-bound particles	Treatment of pancreatic cancer.	2013-09-06	2013	Secondary Indication	Treatment of metastatic adenocarcinoma of the pancreas as first-line treatment, in combination with gemcitabine.	Oncology	P	drug
Taxol	Paclitaxel	Treatment of AIDS-related Kaposi's sarcoma.	1997-08-04	1997	Secondary Indication	For the second line treatment of AIDS-related Kaposi's sarcoma.	Oncology	P	drug
Xyrem	oxybate	Treatment of narcolepsy.	2005-11-18	2005	Secondary Indication	Treatment of excessive daytime sleepiness in patients with narcolepsy	Neurology	S	drug
Ocuflox	Ofloxacin	Treatment of bacterial corneal ulcers.	1996-05-22	1996	Secondary Indication	Treatment of bacterial corneal ulcers.	Ophthalmology	S	drug
Arzerra	ofatumumab	Treatment of chronic lymphocytic leukemia	2014-04-17	2014	Secondary Indication	Ofatumumab in combination with chlorambucil, for the treatment of previously untreated patients with chronic lymphocytic leukemia (CLL) for whom fludarabine-based therapy is considered inappropriate.	Oncology	P	biologic
Arzerra	ofatumumab	Treatment of chronic lymphocytic leukemia	2016-01-19	2016	Secondary Indication	For extended treatment of patients who are in complete or partial response after at least two lines of therapy for recurrent or progressive CLL.	Oncology	P	biologic
Arzerra	ofatumumab	Treatment of chronic lymphocytic leukemia	2016-08-30	2016	Secondary Indication	Arzerra in combination with fludarabine and cyclophosphamide for the treatment of patients with relapsed chronic lymphocytic leukemia (CLL).	Oncology	P	biologic
Gazyva	obinutuzumab	Treatment of follicular lymphoma	2016-02-26	2016	Secondary Indication	Indicated for the treatment of patients with follicular lymphoma (FL) who relapsed after, or are refractory to, a rituximab-containing regimen	Oncology	P	biologic
Actimmune	Interferon gamma-1b	Delaying time to disease progression in patients with severe, malignant osteopetrosis.	2000-02-10	2000	Secondary Indication	Delaying time to disease progression in patients with severe, malignant osteopetrosis.	Metabolism and Endocrinology	P	biologic
Opdivo	nivolumab	Treatment of Hodgkin lymphoma	2016-05-17	2016	Secondary Indication	Classical Hodgkin lymphoma that has relapsed or progressed after autologous hematopoietic stem cell transplantation (HSCT) and post-transplantation brentuximab vedotin	Oncology	P	biologic
Avastin	bevacizumab	Therapeutic treatment of patients with ovarian cancer	2014-11-14	2014	Secondary Indication	In combination with paclitaxel, pegylated liposomal doxorubicin, or topotecan for treatment of patients with platinum-resistant, recurrent epithelial ovarian, fallopian tube, or primary peritoneal cancer who received no more than 2 prior chemotherapy regi	Oncology	P	biologic
Opdivo	nivolumab	Treatment of Hodgkin lymphoma	2017-04-25	2017	Secondary Indication	Treatment of adult patients with Classical Hodgkin lymphoma that has relapsed or progressed after 3 or more lines of systemic therapy that includes autologous HSCT	Oncology	P	biologic
Opdivo	nivolumab	Treatment of hepatocellular carcinoma	2017-09-22	2017	Secondary Indication	Treatment of patients with hepatocellular carcinoma (HCC) who have been previously treated with sorafenib	Oncology	P	biologic
Opdivo	nivolumab	(nivolumab and ipilimumab)Treatment of Stage IIb to Stage IV melanoma	2015-09-30	2015	Secondary Indication	Treatment of patients with BRAF V600 wild-type, unresectable or metastatic melanoma	Oncology	P	biologic
Sprycel	Dasatinib	Treatment of chronic myelogenous leukemia	2017-11-09	2017	Secondary Indication	Treatment of pediatric patients with Philadelphia chromosome-positive (Ph+) chronic myeloid leukemia (CML) in chronic phase	Oncology	P	drug
Darzalex	daratumumab	Treatment of multiple myeloma	2016-11-21	2016	Secondary Indication	DARZALEX in combination with lenalidomide and dexamethasone, or bortezomib and dexamethasone, for the treatment of patients with multiple myeloma who have received at least one prior therapy.	Oncology	P	biologic
Darzalex	daratumumab	Treatment of multiple myeloma	2017-06-16	2017	Secondary Indication	In combination with pomalidomide and dexamethasone for the treatment of patients with multiple myeloma who have received at least two prior therapies including lenalidomide and a proteasome inhibitor.	Oncology	S	biologic
Mekinist	trametinib	Treatment of patients with BRAF mutation positive non-small cell lung cancer.	2017-06-22	2017	Secondary Indication	Mekinist in combination with dabrafenib, for the treatment of patients with metastatic non-small cell lung cancer (NSCLC) with BRAF V600E mutation as detected by an FDA-approved test; AND Tafinlar in combination with trametinib, for the treatment of patie	Oncology	P	drug
Treanda	Bendamustine hydrochloride	Treatment of Follicular Lymphoma, Small Lymphocytic Lymphoma, Lymphoplasmacytic Lymphoma, Splenic Marginal Zone Lymphoma, Extranodal Marginal Zone B-cell Lymphoma of Mucosa-Associated Lymphoma Tissue (MALT), and Nodal Marginal Zone Lymphoma (Collectively	2008-10-31	2008	Secondary Indication	Treatment of Indolent B-cell non-Hodgkin lymphoma (NHL) that has progressed during or within six months of treatment with rituximab or a rituximab-containing regimen.	Oncology	S	drug
Gazyva	obinutuzumab	Treatment of follicular lymphoma	2017-11-16	2017	Secondary Indication	in patients achieving at least a partial remission for the treatment of adult patients with previously untreated stage II bulky, II or IV follicular lymphoma	Oncology	P	biologic
Gleevec	imatinib mesylate	Treatment of Philadelphia-positive acute lymphoblastic leukemia	2006-10-19	2006	Secondary Indication	Treatment of adult patients with relapsed or refractory Philadelphia chromosome positive acute lymphoblastic leukemia (Ph+ALL)	Oncology	S	drug
Kcentra	prothrombin complex concentrate (human)	Treatment of patients needing urgent reversal of Vitamin K antagonist therapy for treatment of major bleeding and/or surgical procedures	2013-12-13	2013	Secondary Indication	Urgent reversal of acquired coagulation factor deficiency induced by vitamin K antagonist therapy (VKA, e.g., warfarin) in adult patients with the need for urgent surgery/invasive procedure.	Hematology	S	biologic
Somatuline Depot	lanreotide acetate	Treatment of carcinoid syndrome	2017-09-15	2017	Secondary Indication	treatment of adults with carcinoid syndrome; when used, it reduces the frequency of short-acting somatostatin analog rescue therapy	Metabolism and Endocrinology	S	drug
Lamictal	Lamotrigine	Treatment of Lennox-Gastaut syndrome.	1998-08-24	1998	Secondary Indication	Adjunctive treatment of Lennox-Gastaut syndrome in pediatric and adult patients.	Neurology	S	drug
Yervoy	ipilimumab	Treatment of high risk Stage II, Stage III, and Stage IV melanoma	2015-10-28	2015	Secondary Indication	For the adjuvant treatment of patients with cutaneous melanoma with pathologic involvement of regional lymph nodes of more than 1 mm, who have undergone complete resection including total lymphadenectomy.	Oncology	S	biologic
Yervoy	ipilimumab	Treatment of high risk Stage II, Stage III, and Stage IV melanoma	2017-07-21	2017	Secondary Indication	An expansion of the indication for the treatment of unresectable or metastatic melanoma in pediatric patients (12 years and older).	Oncology	S	biologic
Zorbtive	Somatropin [rDNA]	For use alone or in combination with glutamine in the treatment of short bowel syndrome.	2003-12-01	2003	Secondary Indication	Treatment of short bowel syndrome in patients receiving specialized nutritional support	Gastroenterology	S	biologic
Roferon A	Interferon alfa-2a (recombinant)	Treatment of chronic myelogenous leukemia.	1995-10-19	1995	Secondary Indication	Treatment of chronic myelogenous leukemia.	Oncology	P	biologic
Remicade	infliximab	Treatment of pediatric (0 to 16 years of age) ulcerative colitis	2011-09-23	2011	Secondary Indication	For reducing signs and symptoms and inducing and maintaining clinical remission in pediatric patients 6 years of age and older with moderately to severely active ulcerative colitis who have had an inadequate response to conventional therapy	Gastroenterology	P	biologic
Zemplar	paricalcitol	Treatment of pediatric hyperparathyroidism	2016-10-18	2016	Secondary Indication	Indicated in pediatric patients 10 years and older for the prevention and treatment of secondary hyperparathyroidism associated with Chronic kidney disease (CKD) Stages 3 and 4 and CKD Stage 5 in patients on hemodialysis or peritoneal dialysis	Metabolism and Endocrinology	S	drug
Gleevec	Imatinib mesylate	Treatment of systemic mastocytosis without the D816V c-kit mutation	2006-10-19	2006	Secondary Indication	Treatment of adult patients with aggressive mastocytosis (ASM) without the D816V c-Kit mutation or with c-Kit mutational status unknown	Oncology	S	drug
Feiba	anti-inhibitor coagulant complex	Routine prophylaxis to prevent or reduce the frequency of bleeding episodes in hemophilia A and B patients with inhibitors	2013-12-16	2013	Secondary Indication	Routine prophylaxis to prevent or reduce the frequency of bleeding episodes in hemophilia A and B patients with inhibitors	Hematology	S	biologic
Gleevec	Imatinib mesylate	Treatment of myeloproliferative disorders/myelodysplastic syndromes associated with platelet-derived growth factor gene re-arrangements	2006-10-19	2006	Secondary Indication	Treatment of adult patients with myelodysplastic/myeloproliferative diseases (MDS/MPD) associated with PDGFR (platelet-derived growth factor receptor) gene re-arrangements	Oncology	S	drug
Gleevec	Imatinib mesylate	Treatment of idiopathic hypereosinophilic syndrome including acute and chronic eosinophilic leukemia	2006-10-19	2006	Secondary Indication	Treatment of adult patients with hypereosinophic syndrome (HES) and/or chronic eosinophilic leukemia (CEL) who have the FIP1L1-PDGFRÃ¿}Ã¿Â± fusion kinase (mutational analysis or FISH demonstration of CHIC2 allele deletion) and for patients with HES and/or	Oncology	S	drug
Gleevec	imatinib mesylate	Treatment of gastrointestinal stromal tumors	2002-02-01	2002	Secondary Indication	Treatment of patients with Kit (CD117) positive unresectable and/or metastatic malignant gastrointestinal stromal tumors (GIST)	Oncology	S	drug
Gleevec	imatinib mesylate	Treatment of gastrointestinal stromal tumors	2008-12-19	2008	Secondary Indication	Adjuvant treatment of adult patients following complete resection Kit (CD 117) positive gastrointestinal stromal tumors (GIST).	Oncology	P	drug
Humira	adalimumab	Treatment of non-infectious intermediate, posterior, or pan-uveitis, or chronic non-infectious anterior uveitis	2016-06-30	2016	Secondary Indication	Indicated for the treatment of non-infectious intermediate, posterior and panuveitis in adult patients	Ophthalmology	S	biologic
Humira	adalimumab	Treatment of moderate to severe hidradenitis suppurativa (Hurley stage 2 and Hurley stage 3 disease)	2015-09-09	2015	Secondary Indication	Treatment of moderate to severe hidradenitis suppurativa	Dermatology	S	biologic
Humira	adalimumab	Treatment of juvenile rheumatoid arthritis	2014-09-30	2014	Secondary Indication	Reducing signs and symptoms of moderately to severely active polyarticular juvenile idiopathic arthritis in patients 2 years to 4 years of age.	Rheumotology & Immunology	S	biologic
Lumizyme	acid alpha-glucosidase; alglucosidase alfa (Recombinant human)	Treatment of glycogen storage disease type II.	2014-08-01	2014	Secondary Indication	(Lumizyme) Patients with Pompe disease (acid alpha-glucosidase (GAA deficiency)).	Metabolism and Endocrinology	P	biologic
Ixiaro	Japanese encephalitis vaccine, inactivated, adsorbed	Prevention of Japanese encephalitis virus in pediatric patients.	2013-05-17	2013	Secondary Indication	To extend the age range to include infants, children, and adolescents 2 months to less than 17 years of age for active immunization for the prevention of disease caused by Japanese encephalitis virus.	Infectious Disease	S	biologic
Remicade	Infliximab	Treatment of pediatric (0 to 16 years of age) Crohn's Disease	2006-05-19	2006	Secondary Indication	For reducing signs and symptoms and inducing and maintaining clinical remission in pediatric patients with moderately to severely active Crohn's disease who have had an inadequate response to conventional therapy	Gastroenterology	P	biologic
Orkambi	lumacaftor/ivacaftor	Treatment of cystic fibrosis	2016-09-28	2016	Secondary Indication	Treatment of cystic fibrosis (CF) in patients age 6-11 year old who are homozygous for the F508del mutation in the CFTR gene	Pulmonary	P	drug
Lipiodol	ethiodized oil injection	Management of patients with known hepatocellular carcinoma (HCC)	2014-04-04	2014	Secondary Indication	Selective hepatic intra-arterial use for imaging tumors in adults with known hepatocellular carcinoma (HCC)	Medical Imaging	S	drug
Somatuline Depot	lanreotide acetate	Treatment of neuroendocrine tumors	2014-12-16	2014	Secondary Indication	Treatment of patients with unresectable,well- or moderately-differentiated locally advanced or metastatic gastroenteropancreatic neuroendocrine tumors to improve progression-free survival	Metabolism and Endocrinology	P	drug
Revlimid	lenalidomide	Treatment of mantle cell lymphoma	2013-06-05	2013	Secondary Indication	Treatment of mantle cell lymphoma whose disease has relapsed or progressed after two prior therapies, one of which included bortezomib.	Oncology	P	drug
Revlimid	lenalidomide	Treatment of multiple myeloma	2017-02-22	2017	Secondary Indication	Treatment of multiple myeloma (MM), as maintenance following autologous hematopoietic stem cell transplantation (auto-HSCT)	Oncology	P	drug
Revlimid	lenalidomide	Treatment of multiple myeloma	2015-02-17	2015	Secondary Indication	For use in combination with dexamethasone for the treatment of patients with multiple myeloma who have not received at least one prior therapy (first line treatment)	Oncology	S	drug
Revlimid	lenalidomide	Treatment of multiple myeloma	2006-06-29	2006	Secondary Indication	For use in combination with dexamethasone for the treatment of multiple myeloma patients who have received at least one prior therapy	Oncology	P	drug
Avastin	bevacizumab	Therapeutic treatment of patients with ovarian cancer	2016-12-06	2016	Secondary Indication	Either in combination with carboplatin and paclitaxel or in combination with carboplatin and gemcitabine, followed by Avastin as a single agent, is indicated for the treatment of patients with platinum-sensitive recurrent epithelial ovarian, fallopian tub	Oncology	P	biologic
Leucovorin Calcium	Leucovorin	For use in combination with 5-fluorouracil for the treatment of metastatic colorectal cancer.	1991-12-12	1991	Secondary Indication	For use in combination with 5-fluorouracil to prolong survival in the palliative treatment of patients with advanced colorectal cancer.	Oncology	n/a	drug
Novoseven	Coagulation factor VIIa (recombinant)	Prevention of bleeding episodes in patients with acquired inhibitors to Factor VIII or Factor IX	2006-10-13	2006	Secondary Indication	Prevention of bleeding in surgical interventions or invasive procedures in patients with acquired hemophilia	Hematology	S	biologic
Gleevec	imatinib mesylate	Treatment of Philadelphia-positive acute lymphoblastic leukemia	2013-01-25	2013	Secondary Indication	Treatment of pediatric patients with newly diagnosed Philadelphia chromosome-positive acute lymphoblastic leukemia (Ph+ ALL) in combination with chemotherapy, approved under NDA #21588/S-037	Oncology	P	drug
Fusilev	Levoleucovorin	For use in combination chemotherapy with the approved agent 5-fluorouracil in the palliative treatment of metastatic adenocarcinoma of the colon and rectum	2011-04-29	2011	Secondary Indication	For use in combination chemotherapy with 5-fluorouracil in the palliative treatment of patients with advanced metastatic colorectal cancer	Oncology	S	drug
Imbruvica	ibrutinib	Treatment of Waldenstrom's macroglobulinemia	2015-01-29	2015	Secondary Indication	Treatment of patients with Waldenstrom's macroglobulinemia	Oncology	P	drug
Mobic	meloxicam	Treatment of juvenile rheumatoid arthritis	2005-08-11	2005	Secondary Indication	For relief of the signs and symptoms of pauciarticular or polyarticular course Juvenile Rheumatoid Arthritis in patients 2 years of age or older	Rheumotology & Immunology	P	drug
Methotrexate	Methotrexate sodium	Treatment of osteogenic sarcoma.	1988-04-07	1988	Secondary Indication	For the use of high dose methotrexate with leucovorin rescue in patients with non-metastatic osteosarcoma who have undergone surgical resection or amputation for the primary tumor.	Oncology	n/a	drug
Novantrone	Mitoxantrone	Treatment of hormone refractory prostate cancer.	1996-11-13	1996	Secondary Indication	In combination with corticosteroids as initial chemotherapy for the treatment of patients with pain related to advanced hormone-refractory prostate cancer.	Oncology	P	drug
Topamax	Topiramate	Treatment of Lennox-Gastaut syndrome.	2001-08-28	2001	Secondary Indication	As adjunctive therapy in patients two years and older with siezures associated with Lennox-Gastaut syndrome.	Neurology	S	drug
Mekinist	trametinib	Treatment of Stage IIb through IV melanoma.	2014-01-08	2014	Secondary Indication	MEKINIST (trametinib) in combination with dabrafenib for treatment of patients with unresectable or metastatic melanoma with BRAF V600E or V600K mutations as detected by an FDA-approved test. This indication is based on the demonstration of durable respon	Oncology	P	drug
Herceptin	trastuzumab	Treatment of HER2-overexpressing advanced adenocarcinoma of the stomach, including gastroesophageal junction	2010-10-20	2010	Secondary Indication	Treatment of patients with HER2 overexpressing metastatic gastric or gastroesophageal junction adenocarcinoma, who have not received prior treatment for metastatic disease	Oncology	P	biologic
Vistogard	uridine triacetate	An antidote in the treatment of 5-fluorouracil or capecitabine poisoning	2015-12-11	2015	Secondary Indication	For the emergency treatment of adult and pediatric patients following a fluorouracil or capecitabine overdose regardless of the presence of symptoms, or who exhibit early-onset, severe or life-threatening toxicity affecting the cardiac or central nervous	Antidotes and Medical Countermeasures	P	drug
Zelboraf	vemurafenib	Treatment of Erdheim-Chester Disease	2017-11-06	2017	Secondary Indication	Treatment of patients with Erdheim-Chester Disease with BRAF V600 mutation	Hematology	P	drug
Harvoni	ledipasvir/sofosbuvir	Treatment of chronic hepatitis C virus (HCV) infection in pediatric patients	2017-04-07	2017	Secondary Indication	Treatment of pediatric patients 12 years of age and older or weighing at least 35 kg with chronic hepatitis C virus genotype 1, 4, 5, or 6 infection without cirrhosis or with compensated cirrhosis	Infectious Disease	P	drug
Sovaldi	sofosbuvir	Treatment of pediatric chronic hepatitis C virus infection	2017-04-07	2017	Secondary Indication	Treatment of chronic HCV genotype 2 or 3 infection in pediatric patients 12 years of age and older or weighing at least 35 kg without cirrhosis or with compensated cirrhosis for use in combination with ribavirin	Infectious Disease	P	drug
Carnitor	Levocarnitine (oral solution)	Treatment of primary and secondary carnitine deficiency of genetic origin.	1992-12-16	1992	Secondary Indication	Treatment of primary systemic carnitine deficiency. (approved 12/27/85) Treatment of secondary carnitine deficiency. (approved 12/16/92)	Metabolism and Endocrinology	S	drug
Horizant	gabapentin enacarbil	Treatment of postherpetic neuralgia	2012-06-06	2012	Secondary Indication	Management of postherpetic neuralgia in adults.	Analgesia	S	drug
Afinitor	everolimus	Treatment of neuroendocrine tumors	2016-02-26	2016	Secondary Indication	Treatment of adult patients with progressive, well-differentiated, non-functional, neuroendocrine tumors (NET) of gastrointestinal (GI) or lung origin, (excluding pancreatic) with unresectable, locally advanced or metastatic disease.	Oncology	P	drug
Afinitor	everolimus	Treatment of neuroendocrine tumors	2011-05-05	2011	Secondary Indication	Treatment of progressive neuroendocrine tumors of pancreatic origin (PNET) in patients with unresectable, locally advanced or metastatic disease	Oncology	P	drug
Afinitor	everolimus	Treatment of tuberous sclerosis complex including TSC-associated subependymal giant cell astrocytoma (SEGA), TSC-associated angiomyolipoma and TSC-associated lymphangioleiomyomatosis (LAM)	2012-04-26	2012	Secondary Indication	Treatment of adults with renal angiomyolipoma and tuberous sclerosis complex (TSC) not requiring immediate surgery.	Oncology	P	drug
Afinitor	everolimus	Treatment of tuberous sclerosis complex including TSC-associated subependymal giant cell astrocytoma (SEGA), TSC-associated angiomyolipoma and TSC-associated lymphangioleiomyomatosis (LAM)	2010-10-29	2010	Secondary Indication	Treatment of patients with subependymal giant cell astrocytoma (SEGA) associated with tuberous sclerosis who require therapeutic intervention but are not candidates for curative surgical resection	Oncology	P	drug
Neupogen	filgrastim	Treatment of subjects at risk of developing myelosuppression after a radiological or nuclear incident	2015-03-30	2015	Secondary Indication	To increase survival in patients acutely exposed to myelosuppressive doses of radiation (Hematopoietic Syndrome of Acute Radiation Syndrome).	Antidotes and Medical Countermeasures	P	biologic
Neupogen	Filgrastim	For use in the mobilization of peripheral blood progenitor cells for collection in patients who will receive myeloablative or myelosuppressive chemotherapy.	1995-12-28	1995	Secondary Indication	For use in the mobilization of hematopoietic progenitor cells into the peripheral blood collection by leukapheresis.	Hematology	P	biologic
Neupogen	Filgrastim	Reduction in the duration of neutropenia, fever, antibiotic use, and hospitalization, following induction and consolidation treatment for acute myeloid leukemia.	1998-04-02	1998	Secondary Indication	Reducing the time to neutrophil recovery and the duration of fever, following induction or consolidation chemotherapy treatment of adults with acute myeloid leukemia.	Hematology	S	biologic
Neupogen	Filgrastim	Treatment of neutropenia associated with bone marrow transplants.	1994-06-15	1994	Secondary Indication	Reduce the duration of neutropenia and neutropenia sequelae in patients with non-myeloid malignancies undergoing ablative chemotherapy followed by BMT.	Hematology	unknown	biologic
Neupogen	Filgrastim	Treatment of patients with severe chronic neutropenia (absolute neutrophil count less than 500/mm3).	1994-12-19	1994	Secondary Indication	Treatment of patients with severe chronic neutropenia.	Hematology	P	biologic
Gleevec	imatinib mesylate	Treatment of dermatofibrosarcoma protuberans	2006-10-19	2006	Secondary Indication	Treatment of adult patients with unresectable, recurrent and/or metastatic dermatofibrosarcoma protuberans (DFSP)	Oncology	S	drug
Antizol	Fomepizole	Treatment of methanol or ethylene glycol poisoning.	2000-12-08	2000	Secondary Indication	Use for suspected or confirmed methanol poisoning, either alone or in combination with hemodialysis	Antidotes and Medical Countermeasures	S	drug
M.V.I.-12	multi-vitamin infusion without vitamin K	Prevention of vitamin deficiency and thromboembolic complications in people receiving home parenteral nutrition and warfarin-type anticoagulant therapy	2004-09-09	2004	Secondary Indication	Prevention of vitamin deficiency and thrombormbolic complications in people receiving home parenteral nutrition who also receive warfarin-type anticoagulant therapy	Metabolism and Endocrinology	P	drug
Ravicti	glycerol phenylbutyrate	Maintenance treatment of patients with deficiencies in enzymes of the urea cycle	2017-04-28	2017	Secondary Indication	For use as a nitrogen-binding agent for chronic management of pediatric patients =2 months and	Metabolism and Endocrinology	S	drug
Droxia	Hydroxyurea	Treatment of patients with sickle cell anemia as shown by the presence of hemoglobin S.	1998-02-25	1998	Secondary Indication	To reduce the frequency of painful crises and to reduce the need for blood transfusions in adult patients with sickle cell anemia with recurrent moderate to severe painful crises (generally at least 3 during the preceding 12 months).	Hematology	P	drug
Imbruvica	ibrutinib	Treatment of chronic lymphocytic leukemia (CLL)	2016-03-04	2016	Secondary Indication	Indicated for the treatment of patients with chronic lymphocytic leukemia without 17p deletion who have not received at least one prior therapy (first line therapy).	Oncology	P	drug
Imbruvica	ibrutinib	Treatment of chronic lymphocytic leukemia (CLL)	2014-02-12	2014	Secondary Indication	Treatment of patients with chronic lymphocytic leukemia (CLL) who have received at least one prior therapy	Oncology	P	drug
Imbruvica	ibrutinib	Treatment of nodal marginal zone lymphoma	2017-01-18	2017	Secondary Indication	Treatment of patients with Marginal Zone Lymphoma (MZL) who require systemic therapy and have received at least one prior anti-CD20-based therapy.	Oncology	P	drug
Imbruvica	ibrutinib	Treatment of patients with extranodal marginal zone lymphoma (mucosa associated lymphoid tissue [MALT type] lymphoma)	2017-01-18	2017	Secondary Indication	Treatment of patients with Marginal Zone Lymphoma (MZL) who require systemic therapy and have received at least one prior anti-CD20-based therapy.	Oncology	P	drug
Imbruvica	ibrutinib	Treatment of small lymphocytic lymphoma	2016-05-06	2016	Secondary Indication	For treatment of patients with small lymphocytic lymphoma (SLL)	Oncology	P	drug
Imbruvica	ibrutinib	Treatment of splenic marginal zone lymphoma	2017-01-18	2017	Secondary Indication	Treatment of patients with Marginal Zone Lymphoma (MZL) who require systemic therapy and have received at least one prior anti-CD20-based therapy.	Oncology	P	drug
Imbruvica	ibrutinib	Treatment of chronic Graft versus Host disease.	2017-08-02	2017	Secondary Indication	Treatment of adult patients with chronic graft versus host disease (cGVHD)	Rheumotology & Immunology	P	drug
Imbruvica	ibrutinib	Treatment of chronic lymphocytic leukemia (CLL)	2014-07-28	2014	Secondary Indication	Treatment of patients with chronic lymphocytic leukemia with 17p deletion who have not received at least one prior therapy	Oncology	P	drug
Gonal-F	Follitropin alfa, recombinant	For the initiation and re-initiation of spermatogenesis in adult males with reproductive failure due to hypothalamic or pituitary dysfunction, hypogonadotropic hypogonadism. AMENDED indication 6/27/00: For the induction of spermatogenesis in men with prim	2000-05-24	2000	Secondary Indication	For the induction of spermatogenesis in men with primary and secondary hypogonadotropic hypogonadism in whom the cause of infertility is not due to primary testicular failure.	Reproductive	S	drug
Prograf	Tacrolimus	Prophylaxis of organ rejection in patients receiving heart transplants.	2006-03-29	2006	Secondary Indication	Prophylaxis of organ rejection in patients receiving allogenic heart transplants.	Transplant	S	drug
Humatrope	Somatropin [rDNA]	Treatment of short stature associated with Turner syndrome.	1997-03-11	1997	Secondary Indication	Treatment of short stature associated with Turner syndrome in patients whose epiphyses are not closed.	Metabolism and Endocrinology	S	biologic
Humatrope	Somatropin [rDNA]	Treatment of short stature in pediatric patients with short stature homeobox-containing gene (SHOX) deficiency	2006-11-01	2006	Secondary Indication	Treatment of short stature or growth failure in children with SHOX (short stature homeobox-containing gene) deficiency whose epiphyses are not closed	Metabolism and Endocrinology	S	biologic
Nutropin	Somatropin [rDNA]	As replacement therapy for growth hormone deficiency in adults after epiphyseal closure.	1997-12-15	1997	Secondary Indication	Replacement of endogenous growth hormone in patients with growth hormone deficiency	Metabolism and Endocrinology	S	biologic
Nutropin	Somatropin [rDNA]	Treatment of short stature associated with Turner's syndrome.	1996-12-30	1996	Secondary Indication	Treatment of growth failure associated with Turner syndrome.	Metabolism and Endocrinology	S	biologic
Norditropin	Somatropin [rDNA]	Treatment of short stature in patients with Noonan syndrome	2007-05-31	2007	Secondary Indication	Treatment of short stature in patients with Noonan syndrome	Metabolism and Endocrinology	S	biologic
Genotropin	Somatropin [rDNA]	Treatment of adults with growth hormone deficiency.	1997-10-31	1997	Secondary Indication	Long term replacement therapy in adults with GH deficiency as demonstrated by an appropriate GH stimulation test	Metabolism and Endocrinology	S	biologic
Genotropin	Somatropin [rDNA]	Treatment of growth failure in children who were born small for gestational age.	2001-07-25	2001	Secondary Indication	For long-term treatment of growth failure in children born small for gestational age who fail to manifest catch-up growth by two years of age.	Metabolism and Endocrinology	S	biologic
Genotropin	Somatropin [rDNA]	Treatment of short stature in patients with Prader-Willi syndrome.	2000-06-20	2000	Secondary Indication	Long-term treatment of pediatric patients who have growth failure due to Prader-Willi syndrome (PWS).	Metabolism and Endocrinology	P	biologic
Nexavar	sorafenib	Treatment of medullary thyroid cancer, anaplastic thyroid cancer, and recurrent or metastatic follicular or papillary thyroid cancer	2013-11-22	2013	Secondary Indication	Treatment of patients with locally recurrent or metastatic, progressive, differentiated thyroid carcinoma (DCT) that is refractory to radioactive iodine treatment.	Oncology	P	drug
Novantrone	Mitoxantrone	Treatment of progressive-relapsing multiple sclerosis.	2000-10-13	2000	Secondary Indication	Reducing neurologic disability and/or the frequency of clinical relapses in patients with secondary (chronic) progressive, progressive relapsing, or worsening relapsing-remitting multiple sclerosis (i.e., patients whose neurologic status is significantly	Neurology	P	drug
Secreflo	Synthetic porcine secretin	For use in the evaluation of exocrine pancreas function.	2002-11-01	2002	Secondary Indication	For use in secretin stimulation testing for: Stimulation of pancreatic secretions to facilitate the identification of the ampulla of Vater and accessory papilla during endoscopic retrograde cholangio-pancreatography (ERCP)	Gastroenterology	P	drug
Jakafi	ruxolitinib	Treatment of polycythemia vera	2014-12-04	2014	Secondary Indication	Treatment of patients with polycythemia vera who have had an inadequate response to or are intolerant of hydroxyurea.	Hematology	P	drug
Adcirca	tadalafil	Treatment of pulmonary arterial hypertension	2009-05-22	2009	Secondary Indication	Treatment of pulmonary arterial hypertension (WHO Group I) to improve exercise ability	Cardiovascular	S	drug
Lymphoseek	technetium Tc 99m tilmanocept	Use in sentinel lymph node detection (SLN) with a hand-held gamma-counter, with scintigraphic imaging, in patients with cancer of the head and neck	2014-06-13	2014	Secondary Indication	Guiding sentinel lymph node biopsy, using a hand-held gamma counter in patients with clinically node negative squamous cell carcinoma of the oral cavity.	Medical Imaging	P	drug
Technetium Tc99m Sulfur Colloi	Technetium Tc99m sulfur colloid injection, lyophilized	For localization of sentinel lymph nodes in patients with melanoma.	2012-08-13	2012	Secondary Indication	Localization of lymph nodes draining a primary tumor in patients with melanoma when used with a hand-held gamma counter	Medical Imaging	S	drug
Temodar	temozolomide	Treatment of recurrent malignant glioma.	2005-03-15	2005	Secondary Indication	Treatment of adult patients with newly diagnosed glioblastoma multiforme concomitatly with radiotherapy and then as maintenance treatment	Oncology	P	drug
Viread	tenofovir	Treatment of pediatric HIV infection.	2010-03-24	2010	Secondary Indication	Treatment of HIV infection in combination with other antiretroviral agents in patients 12 to less than 18 years of age	Infectious Disease	P	drug
Thalomid	Thalidomide	Treatment of multiple myeloma	2006-05-25	2006	Secondary Indication	Treatment of patients with newly diagnosed multiple myeloma	Oncology	S	drug
Thyrogen	Thyrotropin alfa	Treatment of well-differentiated papillary, follicular or combined papillary/follicular carcinomas of the thyroid	2007-12-14	2007	Secondary Indication	For use as an adjunctive treatment for radioiodine ablation of thyroid tissue remnants in patients who have undergone thyroidectomy for well-differentiated thyroid cancer and who do not have evidence of metastatic thyroid cancer	Oncology	P	biologic
Actemra	tocilizumab	Treatment of pediatric patients (age 16 years and younger) with polyarticular-course juvenile idiopathic arthritis	2013-04-29	2013	Secondary Indication	Treatment of active polyarticular juvenile idiopathic arthritis in patients 2 through 16 years of age.	Rheumotology & Immunology	S	biologic
Actemra	tocilizumab	Treatment of chimeric antigen receptor (CAR) T cell-induced cytokine release syndrome	2017-08-30	2017	Secondary Indication	Treatment of chimeric antigen receptor (CAR) T cell-induced severe or life-threatening cytokine release syndrome (CRS) in adults and pediatric patients 2 years of age and older	Rheumotology & Immunology	P	biologic
Nucala	mepolizumab	Treatment of Churg-Strauss Syndrome.	2017-12-12	2017	Secondary Indication	treatment of adult patients with Eosinophilic Granulomatosis Polyangiitis (EGPA)	Pulmonary	P	biologic
Nexavar	Sorafenib	Treatment of hepatocellular carcinoma	2007-11-16	2007	Secondary Indication	Treatment of unresectable hepatocellular carcinoma	Oncology	P	drug
Cyramza	ramucirumab	Treatment of gastric cancer	2014-11-05	2014	Secondary Indication	Treatment of advanced gastric or gastro-esophageal junction adenocarcinoma, as a single agent or in combination with paclitaxel, after prior fluoropyrimidine- or platinium-containing chemotherapy.	Oncology	S	biologic
Leucovorin Calcium	Leucovorin	For rescue use after high dose methotrexate therapy in the treatment of osteosarcoma.	1988-08-31	1988	Secondary Indication	rescue use after high-dose methotrexate therapy in osteosarcoma	Oncology	n/a	drug
Synarel	Nafarelin acetate	Treatment of central precocious puberty.	1992-02-26	1992	Secondary Indication	Treatment of central precocious puberty (gonadotropin-dependent precocious puberty) in children of both sexes.	Metabolism and Endocrinology	n/a	drug
Votrient	pazopanib	Treatment of soft tissue sarcomas	2012-04-26	2012	Secondary Indication	Advanced soft tissue sarcoma (STS) who have received prior chemotherapy	Oncology	S	drug
Neulasta	Pegfilgrastim	Treatment of subjects at risk of developing myelosuppression after a radiological or nuclear incident	2015-11-13	2015	Secondary Indication	To increase survival in patients acutely exposed to myelosuppressive doses of radiation (Hematopoietic Subsyndrome of Acute Radiation Syndrome)	Antidotes and Medical Countermeasures	P	biologic
PEG-Intron	peginterferon alfa-2b	Treatment of malignant melanoma stages IIb through IV.	2011-03-29	2011	Secondary Indication	Adjuvant treatment of melanoma with microscopic or gross nodal involvement within 84 days of definitive surgical resection including complete lymphadenectomy	Oncology	P	biologic
Keytruda	pembrolizumab	Treatment of gastric cancer, including gastroesophageal junction adenocarcinoma	2017-09-22	2017	Secondary Indication	Treatment of patients with recurrent locally advanced or metastatic gastric or gastroesophageal junction adenocarcinoma whose tumors express PD-L1 [Combined Positive Score (CPS) >or =1] as determined by an FDA-approved test, with disease progression on or	Oncology	P	biologic
Keytruda	pembrolizumab	Treatment of Hodgkin lymphoma.	2017-03-14	2017	Secondary Indication	Treatment for patients with refractory classical Hodgkin Lymphoma (cHL), or who have relapsed after greater than or equal to 3 prior lines of therapy.	Oncology	P	biologic
Keytruda	pembrolizumab	Treatment of Stage IIB through IV malignant melanoma	2015-12-18	2015	Secondary Indication	Treatment of patients with unresectable or metastatic melanoma.	Oncology	P	biologic
Salagen	Pilocarpine	Treatment of xerostomia and keratoconjunctivitis sicca in Sjogren's syndrome patients.	1998-02-11	1998	Secondary Indication	Treatment of dry mouth in patients with Sjogren's syndrome.	Other	S	drug
Gliadel	polifeprosan 20 with carmustine	Treatment of malignant glioma.	2003-02-25	2003	Secondary Indication	Expanding the indication to include patients with malignant glioma undergoing primary surgical resection.	Oncology	P	drug
Rapamune	sirolimus	Treatment of lymphangioleiomyomatosis	2015-05-28	2015	Secondary Indication	Treatment of lymphangioleiomyomatosis (LAM)	Pulmonary	P	drug
Evista	raloxifene	Reduction of the risk of breast cancer in postmenopausal women	2007-09-13	2007	Secondary Indication	Reduction in risk of invasive breast cancer in postmenopausal women with osteoporosis and reduction in risk of invasive breast cancer in postmenopausal women at high risk for invasive breast cancer	Oncology	S	drug
Leukine	Sargramostim	To reduce neutropenia and leukopenia and decrease the incidence of death due to infection in patients with acute myelogenous leukemia.	1995-09-15	1995	Secondary Indication	Following induction chemotherapy in older adult patients with acute myelogenous leukemia to shorten time to neutrophil recovery and to reduce the incidence of severe and life-threatening infections and infections resulting in death.	Hematology	unknown	biologic
Stivarga	regorafenib	Treatment gastrointestinal stromal tumors	2013-02-25	2013	Secondary Indication	Treatment of patients with locally advanced, unresectable or metastatic gastrointestinal stromal tumor (GIST) who have been previously treated with imatinib mesylate and sunitinib malate.	Oncology	P	drug
Stivarga	regorafenib	Treatment of hepatocellular carcinoma	2017-04-27	2017	Secondary Indication	Treatment of patients with hepatocellular carcinoma (HCC or liver cancer) who have been previously treated with the drug sorafenib.	Oncology	P	drug
H.P. Acthar Gel	repository corticotropin or adrenocorticotropic hormone	Treatment of infantile spasms	2010-10-15	2010	Secondary Indication	To treat infantile spasms	Neurology	S	drug
Photrexa Viscous	riboflavin ophthalmic solution & ultraviolet A	Treatment of corneal ectasia following refractive surgery	2016-07-15	2016	Secondary Indication	Treatment of corneal ectasia following refractive surgery	Ophthalmology	P	drug
Xifaxan	rifaximin	Treatment of hepatic encephalopathy	2010-03-24	2010	Secondary Indication	Reduction in the risk of overt hepatic encephalopathy (HE) recurrence in patients greater than or equal to 18 years of age	Gastroenterology	P	drug
Rituxan	rituximab	Treatment of chronic lymphocytic leukemia	2010-02-18	2010	Secondary Indication	Treatment of patients previously untreated for CD20-positive chronic lymphocytic leukemia in combination wih fludarbine and cyclophosphamide	Oncology	P	biologic
Rituxan	rituximab	Treatment of patients with anti-neutrophil cytoplasmic antibody-associated vasculitis (Wegener's Granulomatosis, Microscopic Polyangiitis, and Churg-Strauss Syndrome)	2011-04-19	2011	Secondary Indication	For the use of Rituxan (rituximab) in combination with glucocorticoids for the treatment of patients with Wegener's Granulomatosis (WG) and Microscopic Polyangiitis (MPA). )	Rheumotology & Immunology	P	biologic
Istodax	romidepsin	Treatment of non-Hodgkin T-cell lymphomas	2011-06-16	2011	Secondary Indication	Treatment of peripheral T-cell lymphoma (PTCL) in patients who have received at least one prior therapy	Oncology	P	drug
Crestor	rosuvastatin	For the treatment of pediatric homozygous familial hypercholesterolemia	2016-05-27	2016	Secondary Indication	An adjunct to diet to reduce LDL-C, Total-C, nonHDL-C and ApoB in children and adolescents 7 to 17 years of age with homozygous familial hypercholesterolemia, either alone or with other lipid-lowering treatments (e.g., LDL apheresis).	Metabolism and Endocrinology	S	drug
Novantrone	Mitoxantrone	Treatment of secondary-progressive multiple sclerosis.	2000-10-13	2000	Secondary Indication	Reducing neurologic disability and/or the frequency of clinical relapses in patients with secondary (chronic) progressive, progressive relapsing, or worsening relapsing-remitting multiple sclerosis (i.e., patients whose neurologic status is significantly	Neurology	P	drug
Photofrin	Porfimer sodium	For the ablation of High-Grade Dysplasia in Barrett's Esophagus in patients who are not considered to be candidates for esophagectomy	2003-08-01	2003	Secondary Indication	For the ablation of high-grade dysplasia in Barrett's esophagus patients who do not undergo esophagectomy	Oncology	P	drug
Velcade	bortezomib	Treatment of mantle cell lymphoma.	2014-10-08	2014	Secondary Indication	Treatment of patients with mantle cell lymphoma who have not received at least 1 prior therapy	Oncology	P	drug
Xgeva	denosumab	Treatment of hypercalcemia in malignancy	2014-12-05	2014	Secondary Indication	To treat hypercalcemia of malignancy refractory to biphosphonate therapy.	Metabolism and Endocrinology	P	biologic
Exjade	deferasirox	Treatment of chronic iron overload in alpha-thalassemia	2013-01-23	2013	Secondary Indication	Treatment of chronic iron overload in patients 10 years of age and older with non-transfusion dependent thalassemia (NTDT) syndromes and with a liver iron concentration (LIC) of at least 5 milligrams of iron per gram of liver dry weight (mg Fe/g dw) and s	Hematology	S	drug
Avastin	bevacizumab	Treatment of primary peritoneal carcinoma.	2014-11-14	2014	Secondary Indication	In combination with paclitaxel, pegylated liposomal doxorubicin, or topotecan for treatment of patients with platinum-resistant, recurrent epithelial ovarian, fallopian tube, or primary peritoneal cancer who received no more than 2 prior chemotherapy regi	Oncology	P	biologic
Tafinlar	dabrafenib	Treatment of Stage IIb through IV melanoma.	2014-01-08	2014	Secondary Indication	TAFINLAR (dabrafenib) in combination with trametinib for treatment of patients with unresectable or metastatic melanoma with BRAF V600E or V600K mutations as detected by an FDA-approved test. This indication is based on the demonstration of durable respon	Oncology	P	drug
Avastin	bevacizumab	Treatment of primary peritoneal carcinoma.	2016-12-06	2016	Secondary Indication	Either in combination with carboplatin and paclitaxel or in combination with carboplatin and gemcitabine, followed by Avastin as a single agent, is indicated for the treatment of patients with platinum-sensitive recurrent epithelial ovarian, fallopian tub	Oncology	P	biologic
Procysbi	cysteamine enteric coated	Treatment of cystinosis	2015-08-14	2015	Secondary Indication	To expand the indication to pediatric patients 2-6 years of age with nephropathic cystinosis	Metabolism and Endocrinology	S	drug
Procysbi	cysteamine enteric coated	Treatment of cystinosis	2017-12-22	2017	Secondary Indication	treatment of nephropathic cystinosis in adults and pediatric patients 1 year of age and older	Metabolism and Endocrinology	P	drug
Zykadia	ceritinib	Treatment of patients with non-small cell lung cancer (NSCLC) that is anaplastic lymphoma kinase(ALK)-positive	2017-05-26	2017	Secondary Indication	Treatment of patients with metastatic non-small cell lung cancer (NSCLC) whose tumors are anaplastic lymphoma kinase (ALK)-positive as detected by an FDA-approved test	Oncology	P	drug
Sensipar	cinacalcet	Treatment of hypercalcemia in patients with primary hyperparathyroidism for whom parathyroidectomy would be indicated on the basis of serum calcium levels, but who are unable to undergo surgery	2011-02-25	2011	Secondary Indication	Treatment of severe hypercalcemia in patients with primary hyperparathyroidism who are unable to undergo parathyroidectomy	Metabolism and Endocrinology	S	drug
Avastin	bevacizumab	Treatment of malignant glioma	2009-05-05	2009	Secondary Indication	Treatment of glioblastoma with progressive disease following prior therapy	Oncology	P	biologic
Xgeva	denosumab	Treatment of patients with giant cell tumor of bone	2013-06-13	2013	Secondary Indication	Treatment of adults and skeletally mature adolescents with giant cell tumor of bone that is unresectable or where surgical resection is likely to result in severe morbidity.	Metabolism and Endocrinology	P	biologic
Blenoxane	Bleomycin sulfate	Treatment of malignant pleural effusion.	1996-02-20	1996	Secondary Indication	Treatment of malignant pleural effusion.	Oncology	S	drug
Xiaflex	collagenase clostridium histolyticum	Treatment of Peyronie's disease.	2013-12-06	2013	Secondary Indication	Treatment of adult men with Peyronie's disease with a palpable plaque and curvature deformity of at least 30 degrees at the start of therapy.	Urology	S	biologic
Carnitor	Levocarnitine (oral solution)	Treatment of manifestations of carnitine deficiency in patients with end stage renal disease who require dialysis.	1999-12-15	1999	Secondary Indication	Prevention and treatment of carnitine deficiency in patients with end stage renal disease who are undergoing dialysis.	Metabolism and Endocrinology	S	drug
Velcade	bortezomib	Treatment of mantle cell lymphoma.	2006-12-08	2006	Secondary Indication	Treatment of patients with mantle cell lymphoma who have received at least 1 prior therapy.	Oncology	P	drug
Sensipar	cinacalcet	Treatment of hypercalcemia in patients with primary hyperparathyroidism for whom parathyroidectomy would be indicated on the basis of serum calcium levels, but who are unable to undergo surgery	2014-11-21	2014	Secondary Indication	Treatment of hypercalcemia in adult patients with primary hyperparathyroidism for whom parathyroidectomy would be indicated on the basis of serum calcium levels, but who are unable to undergo parathyroidectomy.	Metabolism and Endocrinology	S	drug
Velcade	bortezomib	Treatment of multiple myeloma	2005-03-25	2005	Secondary Indication	Treatment of multiple myeloma patients who have received at least one prior therapy	Oncology	P	drug
Velcade	bortezomib	Treatment of multiple myeloma	2008-06-20	2008	Secondary Indication	First-line therapy of multiple myeloma.	Oncology	P	drug
Erbitux	cetuximab	Treatment of squamous cell cancer of the head and neck in patients who express epidermal growth factor receptor	2006-03-01	2006	Secondary Indication	For use in combination with radiation therapy, for the treatment of locally or regionally advanced squamous cell carcinoma of the head and neck (SCCHN) and for use as a single agent for the treatment of patients with recurrent or metastatic SCCHN for whom	Oncology	P	biologic
Ilaris	canakinumab	Treatment of pediatric (age 16 and under) juvenile rheumatoid arthritis.	2013-05-09	2013	Secondary Indication	Treatment of active Systemic Juvenile Idiopathic Arthritis (SJIA) in patients aged 2 through 16 years.	Rheumotology & Immunology	P	biologic
Ilaris	canakinumab	Treatment of TNF-receptor associated periodic syndrome (TRAPS)	2016-09-23	2016	Secondary Indication	Indicated for Tumor Necrosis Factor Receptor Associated Periodic Syndrome (TRAPS) in adult and pediatric patients	Rheumotology & Immunology	P	biologic
Bosulif	bosutinib	Treatment of chronic myelogenous leukemia	2017-12-19	2017	Secondary Indication	Treatment of adult patients with newly-diagnosed chronic phase Philadelphia chromosome-positive chronic myelougenous leukemia	Oncology	P	drug
Ilaris	canakinumab	Treatment of familial mediterranean fever	2016-09-23	2016	Secondary Indication	Indicated for Familial Mediterranean Fever (FMF) in adult and pediatric patients	Rheumotology & Immunology	P	biologic
Ilaris	canakinumab	Treatment of hyperimmunoglobulinemia D and periodic fever syndrome	2016-09-23	2016	Secondary Indication	Indicated for Hyperimmunoglobulin D Syndrome (HIDS)/Mevalonate Kinase Deficiency (MKD) in adult and pediatric patients	Rheumotology & Immunology	P	biologic
Avastin	bevacizumab	Treatment of renal cell carcinoma	2009-07-31	2009	Secondary Indication	Treatment of renal cell carcinoma in combination with interferon alfa	Oncology	S	biologic
Halaven	eribulin mesylate	Treatment of soft tissue sarcoma	2016-01-28	2016	Secondary Indication	Treatment of patients with unresectable or metastatic liposarcoma who have received a prior anthracyclne-containing regimen	Oncology	P	drug
Adcetris	brentuximab vedotin	Treatment of anaplastic large cell lymphoma	2017-11-09	2017	Secondary Indication	For adult patients with primary cutaneous anaplastic large cell lymphoma	Oncology	P	biologic
Botox	Botulinum toxin type A	Treatment of cervical dystonia.	2000-12-21	2000	Secondary Indication	Treatment of cervical dystonia in adults to decrease the severity of abnormal head position and neck pain associated with cervical dystonia.	Neurology	S	biologic
Dysport	Botulinum toxin type A	Treatment of dynamic muscle contractures in pediatric cerebral palsy patients.	2016-07-29	2016	Secondary Indication	Treatment of lower limb spasticity in pediatric cerebral patients 2 years of age and older	Neurology	S	biologic
Ozurdex	dexamethasone intravitreal implant	Treatment of non-infectious ocular inflammation of the posterior segment in patients with intermediate, posterior, and panuveitis	2010-09-24	2010	Secondary Indication	For treatment of non-infectious uveitis affecting the posterior segment of the eye	Ophthalmology	S	drug
Adcetris	brentuximab vedotin	Treatment of Hodgkin's lymphoma	2015-08-17	2015	Secondary Indication	Treatment of patients with classical Hodgkin lymphoma at high risk of relapse or progression as post-autologous hematopoietic stem cell transplantation (auto-HSCT).	Oncology	P	biologic
Avastin	bevacizumab	Treatment of fallopian tube carcinoma	2016-12-06	2016	Secondary Indication	Either in combination with carboplatin and paclitaxel or in combination with carboplatin and gemcitabine, followed by Avastin as a single agent, is indicated for the treatment of patients with platinum-sensitive recurrent epithelial ovarian, fallopian tub	Oncology	P	biologic
Adcetris	brentuximab vedotin	Treatment of mycosis fungoides	2017-11-09	2017	Secondary Indication	Treatment for adiult patients with CD30-expressing mycosis fungoides who have received prior systemic therapy	Oncology	P	biologic
Avastin	bevacizumab	Treatment of fallopian tube carcinoma	2014-11-14	2014	Secondary Indication	In combination with paclitaxel, pegylated liposomal doxorubicin, or topotecan for treatment of patients with platinum-resistant, recurrent epithelial ovarian, fallopian tube, or primary peritoneal cancer who have received no more than 2 prior chemotherapy	Oncology	P	biologic
Enbrel	etanercept	Reduction in signs and symptoms of moderately to severely active polyarticular-course juvenile rheumatoid arthritis in patients who have had an inadequate response to one or more disease-modifying anti-rheumatic drugs.	1999-05-27	1999	Secondary Indication	Reducing signs and symptoms of moderately to severely active polyarticular juvenile idiopathic arthritis (JIA) in patients ages 2 and older	Rheumotology & Immunology	P	biologic
Avastin	bevacizumab	Treatment of adult patients with recurrent glioblastoma	2017-12-05	2017	Secondary Indication	Treatment of adult patients with recurrent glioblastoma	Oncology	S	biologic
Flolan	epoprostenol	Treatment of secondary pulmonary hypertension due to intrinsic precapillary pulmonary vascular disease.	2000-04-14	2000	Secondary Indication	treatment of pulmonary arterial hypertension (WHO Group 1) to improve exercise capacity. Studies establishing effectiveness included predominantly patients with NYHA Functional Class III-IV symptoms and etiologies of idiopathic or heritable PAH or PAH ass	Cardiovascular	P	drug
Epogen	Epoetin alfa	Treatment of anemia associated with HIV infection or HIV treatment.	1990-12-31	1990	Secondary Indication	Treatment of AZT-induced anemia in HIV infected patients.	Hematology	n/a	biologic
Doxil	Doxorubicin liposome	Treatment of ovarian cancer.	1999-06-28	1999	Secondary Indication	Treatment of metastatic carcinoma of the ovary in patients with disease that is refractory to both paclitaxel- and platinium-based chemotherapy regimens. Refractory disease is defined as disease that has progressed while on treatment, or within 6 months o	Oncology	P	drug
Promacta	eltrombopag	Treatment of aplastic anemia	2014-08-26	2014	Secondary Indication	Treatment of patients with severe aplastic anemia who have had an insufficient response to immunosuppressive therapy.	Hematology	P	drug
Soliris	eculizumab	Treatment of atypical hemolytic uremic syndrome	2011-09-23	2011	Secondary Indication	For the treatment of atypical Hemolytic Uremic Syndrome (aHUS)	Hematology	P	biologic
Soliris	eculizumab	Treatment of Myasthenia Gravis.	2017-10-23	2017	Secondary Indication	for the treatment of adult patients with generalized Myasthenia Gravis (gMG) who are anti-acetylcholine receptor (AchR) antibody positive	Neurology	S	biologic
Kalbitor	ecallantide	Treatment of angioedema	2014-03-28	2014	Secondary Indication	Treatment of acute attacks of hereditary angioedema (HAE) in patients 12 years of age and older	Rheumotology & Immunology	P	biologic
Marinol	Dronabinol	For the stimulation of appetite and prevention of weight loss in patients with a confirmed diagnosis of AIDS.	1992-12-22	1992	Secondary Indication	Treatment of anorexia associated with weight loss in patients with AIDS.	Metabolism and Endocrinology	n/a	drug
Keveyis	dichlorphenamide	Treatment of primary periodic paralyses	2015-08-07	2015	Secondary Indication	Treatment of primary hyperkalemic periodic paralysis, primary hypokalemic period paralysis, and related variants	Neurology	P	drug
Durezol	difluprednate	Treatment of endogenous and traumatic anterior uveitis and panuveitis.	2012-06-13	2012	Secondary Indication	Treatment of endogenous anterior uveitis	Ophthalmology	S	drug
Doxil	Doxorubicin liposome	Treatment of multiple myeloma	2007-05-17	2007	Secondary Indication	For use in combination with bortezomib for the treatment of patients with multiple myeloma who have not previously received bortezomib and have at least one prior therapy.	Oncology	P	drug
Adcetris	brentuximab vedotin	Treatment of Hodgkin's lymphoma	2011-08-19	2011	Novel Drug Product	The treatment of patients with Hodgkin lymphoma after failure of autologous stem cell transplant (ASCT) or after failure of at least two prior multi-agent chemotherapy regimens in patients who are not ASCT candidates	Oncology	P	biologic
Atryn	antithrombin (recombinant human)	Treatment of congenital antithrombin deficiency to prevent the occurrence of serious, potentially life-threatening venous thromboembolisms which may develop as a result of surgical or obstetrical procedures	2009-02-06	2009	Novel Drug Product	Prevention of peri-operative and peri-partum thromboembolic events, in hereditary antithrombin deficient patients.	Hematology	P	biologic
Humate-P	Antihemophilic factor/von Willebrand factor complex (human), dried, pasteurized	Treatment of patients with von Willebrand's disease	1999-04-01	1999	Novel Drug Product	(1) In adult patients for treatment and prevention of bleeding in hemophilia A (classic hemophilia) and (2) in adult and pediatric patients for treatment of spontaneous and trauma-induced bleeding episodes in severe von Willebrand disease, and in mild and	Hematology	S	biologic
Obizur	antihemophilic factor (recombinant), porcine sequence	Treatment and prevention of episodic bleeding in patients with inhibitor antibodies to human coagulation factor VIII	2014-10-23	2014	Novel Drug Product	Treatment of bleeding episodes in adults with acquired hemophilia A.	Hematology	P	biologic
Myalept	metreleptin	Treatment of metabolic disorders secondary to lipodystrophy	2014-02-24	2014	Novel Drug Product	Adjunct to diet as replacement therapy to treat the complications of leptin deficiency in patients with congenital or acquired generalized lipodystrophy.	Metabolism and Endocrinology	P	biologic
Cibacalcin	Calcitonin-human for injection	Treatment of symptomatic Paget's disease (osteitis deformans).	1986-10-31	1986	Novel Drug Product	Treatment of symptomatic Paget's disease	Metabolism and Endocrinology	n/a	drug
Eloctate	antihemophilic factor (recombinant), Fc fusion protein	Treatment of hemophilia A	2014-06-06	2014	Novel Drug Product	Treatment of adults and children with Hemophilia A (congenital Factor VIII deficiency) for control and prevention of bleeding episodes, perioperative management, and routine prophylaxis to prevent or reduce the frequency of bleeding episodes.	Hematology	S	biologic
Infasurf	calfactant	Treatment and prevention of respiratory failure due to pulmonary surfactant deficiency in preterm infants.	1998-07-01	1998	Novel Drug Product	Treatment and prevention of respiratory failure due to pulmonary surfactant deficiency in preterm infants.	Pulmonary	S	drug
Qutenza	capsaicin	Management of neuropathic pain in patients with postherpetic neuralgia	2009-11-16	2009	Novel Drug Product	Management of neuropathic pain associated with postherpetic neuralgia	Analgesia	S	drug
Mesnex	Mesna	For use as a prophylactic agent in reducing the incidence of ifosfamide-induced hemorrhagic cystitis.	1988-12-30	1988	Novel Drug Product	prophylactic agent in reducing the incidence of ifosfamide-induced hemorrhagic cystitis	Other	n/a	drug
Ilaris	canakinumab	Treatment of cryopyrin-associated periodic syndromes	2009-06-17	2009	Novel Drug Product	Treatment of cryopyrin-associated periodic syndromes (CAPS), in adults and children 4 years of age and older.	Rheumotology & Immunology	P	biologic
Adcetris	brentuximab vedotin	Treatment of anaplastic large cell lymphoma	2011-08-19	2011	Novel Drug Product	The treatment of patients with systemic anaplastic large cell lymphoma (sALCL) after failure of at least one prior multi-agent chemotherapy regimen	Oncology	P	biologic
Cometriq	cabozantinib	Treatment of follicular, medullary and anaplastic thyroid carcinoma and metastatic or locally advanced papillary thyroid cancer.	2012-11-29	2012	Novel Drug Product	Treatment of progressive, metastatic medullary thyroid cancer (MTC).	Oncology	P	drug
Chirhostim	Synthetic human secretin	For use in the diagnosis of gastrinoma associated with Zollinger-Ellison syndrome.	2004-04-09	2004	Novel Drug Product	Stimulation of pancreatic secretions, including bicarbonate, to aid in the diagnosis of pancreatic exocrine dysfunction, stimulation of gastrin secretion to aid in the diagnosis of gastrinoma, and stimulation of pancreatic secretions to facilitate the ide	Gastroenterology	P	drug
Mononine	Coagulation factor IX	Replacement treatment and prophylaxis of the hemorrhagic complications of hemophilia B.	1992-08-20	1992	Novel Drug Product	Prevention and control of bleeding in factor IX deficiency, also known as hemophilia B or Christmas disease.	Hematology	n/a	biologic
Anascorp	Centruroides immune F(ab)2	Treatment of scorpion envenomations requiring medical attention.	2011-08-04	2011	Novel Drug Product	Treatment of clinical signs of scorpion envenomation	Antidotes and Medical Countermeasures	P	biologic
Berinert	C1-esterase-inhibitor, human, pasteurized	Prevention and/or treatment of acute attacks of hereditary angioedema.	2009-10-08	2009	Novel Drug Product	Treatment of acute attacks of hereditary angioedema.	Rheumotology & Immunology	P	biologic
Kyprolis	carfilzomib	Treatment of multiple myeloma	2012-07-20	2012	Novel Drug Product	Treatment of patients with multiple myeloma who have received at least two prior therapies including bortezomib and an immunomodulatory agent and have demonstrated disease progression on or within 60 days of completion of the last therapy.	Oncology	S	drug
Ruconest	C1-esterase inhibitor (recombinant)	Treatment of (acute attacks of) angioedema caused by hereditary or acquired C1-esterase inhibitor deficiency.	2014-07-16	2014	Novel Drug Product	Treatment of acute attacks of hereditary angioedema (HAE) in adult and adolescent patients.	Rheumotology & Immunology	S	biologic
Blincyto	blinatumomab	Treatment of acute lymphocytic leukemia	2014-12-03	2014	Novel Drug Product	Treatment of Philadelphia chromosome-negative relapsed or refractory B-cell precursor acute lymphoblastic leukemia (ALL).	Oncology	P	biologic
Babybig	Botulism immune globulin	Treatment of infant botulism.	2003-10-23	2003	Novel Drug Product	Indicated for treatment of infant botulism caused by type A or type B Clostridium botulinum.	Infectious Disease	P	biologic
Myobloc	Botulinum toxin type B	Treatment of cervical dystonia.	2000-12-08	2000	Novel Drug Product	Treatment of patients with cervical dystonia to reduce the severity of abnormal head position and neck pain associated with cervical dystonia.	Neurology	S	biologic
BAT	botulism antitoxin heptavalent (A, B, C, D, E, F, G) (Equine)	Treatment of botulism.	2013-03-22	2013	Novel Drug Product	Treatment of symptomatic botulism following documented or suspected exposure to botulinum neurotoxin serotypes A, B, C, D, E, F, or G in adults and pediatric patients	Infectious Disease	P	biologic
Crofab	Antivenin, crotalidae polyvalent immune Fab (ovine)	Treatment of envenomations inflicted by North American crotalid snakes.	2000-10-02	2000	Novel Drug Product	Treatment of minimal and moderate North American Crotalidae envenomation	Antidotes and Medical Countermeasures	S	biologic
Anavip	Antivenin crotaline (pit-viper) equine immune F(ab)2)	Treatment of envenomation by Crotaline snakes	2015-05-06	2015	Novel Drug Product	Management of adult and pediatric patients with North American rattlesnake envenomation	Antidotes and Medical Countermeasures	S	biologic
Curosurf	surfactant replacement, porcine	For the treatment and prevention of respiratory distress syndrome in premature infants.	1999-11-18	1999	Novel Drug Product	Treatment (rescue) of respiratory distress syndrome in premature infants.	Pulmonary	S	drug
Thrombate III	Antithrombin III (human)	For replacement therapy in congenital deficiency of AT-III for prevention and treatment of thrombosis and pulmonary emboli.	1991-12-30	1991	Novel Drug Product	hereditary antithrombin III (AT-III) deficiency	Hematology	n/a	biologic
Velcade	bortezomib	Treatment of multiple myeloma	2003-05-13	2003	Novel Drug Product	Treatment of multiple myeloma patients who have received at least two prior therapies and have demonstrated disease progression on the last therapy	Oncology	P	drug
Cinryze	C1 esterase inhibitor (human)	Treatment of angioedema	2008-10-10	2008	Novel Drug Product	Routine prophylaxis against angioedema attacks in patients with Hereditary Angioedema (HAE)	Rheumotology & Immunology	P	biologic
Ontak	denileukin diftitox	Treatment of patients with cutaneous T-cell lymphoma	1999-02-05	1999	Novel Drug Product	Treatment of patients with persistent or recurrent cutaneous T-cell lymphoma whose malignant cells express the CD25 component of the IL-2 receptor.	Oncology	P	biologic
Zenapax	Daclizumab	Prevention of acute renal allograft rejection.	1997-12-10	1997	Novel Drug Product	Prophylaxis of acute organ rejection in patients receiving renal transplants, to be used as a part of an immunosuppressive regimen that includes cyclosporine and corticosteroids.	Transplant	P	biologic
Ampyra	dalfampridine	Relief of symptoms of multiple sclerosis	2010-01-22	2010	Novel Drug Product	Treatment to improve walking in patients with multiple sclerosis	Neurology	P	drug
Darzalex	daratumumab	Treatment of multiple myeloma	2015-11-16	2015	Novel Drug Product	For the treatment of patients with multiple myeloma who have received at least 3 prior lines of therapy including a proteasome inhibitor and an immunomodulatory agent or are double refractory to a proteasome inhibitor and an immunomodulatory agent	Oncology	P	biologic
Sprycel	Dasatinib	Treatment of chronic myelogenous leukemia	2006-06-28	2006	Novel Drug Product	Treatment of adults with chronic myeloid leukemia with resistance or intolerance to prior therapy including imatinib	Oncology	P	drug
Sprycel	Dasatinib	Treatment of Philadelphia-positive acute lymphoblastic leukemia	2006-06-28	2006	Novel Drug Product	Treatment of adults with Philadelphia chromosome-positive acute lymphoblastic leukemia with resistance or intolerance to prior therapy	Oncology	P	drug
Dacogen	decitabine	Treatment of myelodysplastic syndromes.	2006-05-02	2006	Novel Drug Product	for treatment of patients with myelodysplastic syndromes (MDS) including previously treated and untreated, de novo and secondary MDS of all French-American-British subtypes (refractory anemia, refractory anemia with ringed sideroblasts, refractory anemia	Oncology	S	drug
Exjade	Deferasirox	Treatment of chronic iron overload in patients with transfusion-dependent anemias	2005-11-02	2005	Novel Drug Product	Treatment of chronic iron overload due to blood transfusions (transfusional hemosiderosis) in patients 2 years of age or older	Hematology	P	drug
Cystagon	Cysteamine	Treatment of nephropathic cystinosis.	1994-08-15	1994	Novel Drug Product	Treatment of nephropathic cystinosis in adults and children.	Metabolism and Endocrinology	P	drug
Defitelio	defibrotide	For the treatment of hepatic veno-occlusive disease	2016-03-30	2016	Novel Drug Product	For the treatment of adult and pediatric patients with hepatic veno-occlusive disease (VOD), also known as sinusoidal obstruction syndrome (SOS), with renal or pulmonary dysfunction following hematopoietic stem cell transplantation (HSCT).	Oncology	P	drug
Kogenate	Antihemophilic factor (recombinant)	Prophylaxis and treatment of bleeding in individuals with hemophilia A or for prophylaxis when surgery is required in individuals with hemophilia A.	1993-02-25	1993	Novel Drug Product	Treatment and prophylaxis of bleeding in patients with hemophilia A (not von Willebrand's disease)	Hematology	n/a	biologic
Zinecard	Dexrazoxane	For the prevention of cardiomyopathy associated with doxorubicin administration.	1995-05-26	1995	Novel Drug Product	Cardiomyopathy associated with doxorubicin administration in women with metastatic breast cancer who have received a cumulative dose of 300mg/m2.	Cardiovascular	P	drug
Kalbitor	ecallantide	Treatment of angioedema	2009-12-01	2009	Novel Drug Product	Treatment of acute attacks of hereditary angioedema in patients 16 years of age and older	Rheumotology & Immunology	P	biologic
Soliris	eculizumab	Treatment of paroxysmal nocturnal hemoglobinuria	2007-03-16	2007	Novel Drug Product	Treatment of paroxysmal nocturnal hemoglobinuria to reduce hemolysis	Hematology	P	biologic
Ornidyl	Eflornithine HCl	Treatment of Trypanosoma brucei gambiense infection (sleeping sickness).	1990-11-28	1990	Novel Drug Product	Trypanosoma brucei gambiense infection (sleeping sickness)	Infectious Disease	n/a	drug
Cerdelga	eliglustat	Treatment of Type I Gaucher disease	2014-08-19	2014	Novel Drug Product	Long-term treatment of adult patients with Gaucher disease type 1 who are CYP2D6 extensive metabolizers (EMs), intermediate metabolizers (IMs), or poor metabolizers (PMs) as detected by an FDA-cleared test.	Metabolism and Endocrinology	P	drug
Vimizim	elosulfase alfa	Use in the treatment of mucopolysaccharidosis (MPS) Type IV A (Morquio A syndrome)	2014-02-14	2014	Novel Drug Product	Patients with Mucopolysaccharidosis type IVA (MPS IVA; Morquio A syndrome)	Metabolism and Endocrinology	P	biologic
Empliciti	elotuzumab	Treatment of multiple myeloma	2015-11-30	2015	Novel Drug Product	Indicated in combination with lenalidomide and dexamethasone for the treatment of patients with multiple myeloma who have received one to three prior therapies	Oncology	P	biologic
Ferriprox	deferiprone	Treatment of iron overload in patients with hematologic disorders requiring chronic transfusion therapy	2011-10-14	2011	Novel Drug Product	Treatment of patients with transfusional iron overload due to thalassemia syndromes when current chelation therapy is inadequate	Hematology	S	drug
Idelvion	coagulation factor IX with albumin (recombinant)	Treatment of patients with congenital factor IX deficiency (hemophilia B).	2016-03-04	2016	Novel Drug Product	Indicated for the (1) on-demand control and prevention of bleeding episodes, (2) perioperative management of bleeding, and (3) routine prophylaxis to prevent or reduce the frequency of bleeding episodes.	Hematology	S	biologic
Fabrazyme	Ceramide trihexosidase/alpha-galactosidase A	Treatment of Fabry's disease.	2003-04-24	2003	Novel Drug Product	For use in patients with Fabry disease to reduce globotriaosylceramide (GL-3) deposition in capillary endothelium of the kidney and certain other cell types	Metabolism and Endocrinology	P	biologic
Zykadia	ceritinib	Treatment of patients with non-small cell lung cancer (NSCLC) that is anaplastic lymphoma kinase(ALK)-positive	2014-04-29	2014	Novel Drug Product	Treatment of patients with anaplastic lymphoma kinase (ALK)-positive metastatic non-small cell lung cancer (NSCLC) who have progressed on or are intolerant to crizotinib.	Oncology	P	drug
Chenix	chenodiol	For patients with radiolucent stones in well opacifying gallbladders, in whom elective surgery would be undertaken except for the presence of increased surgical risk due to systemic disease or age	1983-07-28	1983	Novel Drug Product	dissolution of gallstones	Gastroenterology	n/a	drug
Cholbam	cholic acid	Treatment of inborn errors of cholesterol and bile acid synthesis and metabolism	2015-03-17	2015	Novel Drug Product	Treatment of bile acid synthesis disorders due to single enzyme defects	Metabolism and Endocrinology	P	drug
Sensipar	cinacalcet	Treatment of hypercalcemia in patients with parathyroid carcinoma	2004-03-08	2004	Novel Drug Product	Treatment of hypercalcemia in patients with parathyroid carcinoma	Metabolism and Endocrinology	P	drug
Leustatin	Cladribine	Treatment of hairy cell leukemia.	1993-02-26	1993	Novel Drug Product	Treatment of hairy cell leukemia.	Oncology	P	drug
Onfi	clobazam	Treatment of Lennox-Gastaut Syndrome	2011-10-21	2011	Novel Drug Product	Adjunctive treatment of seizures associated with Lennox-Gastaut Syndrome inpatients 2 years of age or older	Neurology	S	drug
Tafinlar	dabrafenib	Treatment BRAF V600 mutation positive Stage IIB through IV melanoma	2013-05-29	2013	Novel Drug Product	Treatment of patients with unresectable or metastatic melanoma with BRAF V600E mutation as detected by an FDA approved test.	Oncology	S	drug
Lamprene	Clofazimine	Treatment of lepromatous leprosy, including dapsone-resistant lepromatous leprosy and lepromatous leprosy complicated by erythema nodosum leprosum.	1986-12-15	1986	Novel Drug Product	Treatment of lepromatous leprosy	Infectious Disease	n/a	drug
Anthracil	anthrax immune globulin (human)	Treatment of inhalational anthrax	2015-03-24	2015	Novel Drug Product	Treatment of inhalational anthrax in adult and pediatric patients in combination with appropriate antibacterial drugs	Antidotes and Medical Countermeasures	P	biologic
Cotellic	cobimetinib	Treatment of stage IIb, IIc, III, and IV melanoma with BRAFV600 mutation	2015-11-10	2015	Novel Drug Product	For the treatment of patients with unresectable or metastatic melanoma with BRAF V600E or V600K mutation, in combination with vemurafenib. COTELLIC is not indicated for treatment of patients with wild-type BRAF melanoma	Oncology	P	drug
Exosurf	Colfosceril palmitate, cetyl alcohol, tyloxapol	1. Prevention of hyaline membrane disease, also known as respiratory distress syndrome, in infants born at 32 weeks gestation or less 2. prevention of hyaline membrane disease (HMD), also known as respiratory distress syndrome (RDS), in infants born at 32	1990-08-02	1990	Novel Drug Product	Prevention of hyaline membrane disease (HMD), also known as respiratory distress syndrome (RDS), in infants born at 32 weeks gestation or less and in the treatment of established HMO at all gestational ages	Pulmonary	n/a	drug
Xiaflex	collagenase clostridium histolyticum	Treatment of advanced (involutional or residual stage) Dupuytren's disease.	2010-02-02	2010	Novel Drug Product	Treatment of adult patients with Dupuytren's contracture with a palpable cord	Orthopedics	P	biologic
Acthrel	Corticorelin ovine triflutate	For use in differentiating pituitary and ectopic production of ACTH in patients with ACTH-dependent Cushings syndrome.	1996-05-23	1996	Novel Drug Product	To differentiate between pituitary and ectopic production of ACTH in patients with ACTH-dependent Cushing's syndrome.	Metabolism and Endocrinology	P	drug
Xalkori	crizotinib	Treatment of ALK-positive, MET-positive, or ROS-positive non-small cell lung cancer	2011-08-26	2011	Novel Drug Product	Treatment of patients with locally advanced or metastatic non-small cell lung cancer (NSCLC) that is anaplastic lymphoma kinase (ALK)-positive as detected by an FDAapproved test	Oncology	P	drug
Targretin	Bexarotene	Treatment of cutaneous T-cell lymphoma.	1999-12-29	1999	Novel Drug Product	Treatment of cutaneous manifestations of cutaneous T-cell lymphoma in patients who are refractory to at least one prior systemic therapy.	Oncology	P	drug
Refacto	Antihemophilic factor (recombinant)	For the control and prevention of hemorrhagic episodes and for surgical prophylaxis in patients with hemophilia A (congenital factor VIII deficiency or classic hemophilia).	2000-03-06	2000	Novel Drug Product	control and prevention of hemorrhagic episodes and for short-term routine and surgical prophylaxis in patients with hemophilia A	Hematology	S	biologic
Carbaglu	carglumic acid	Treatment of N-acetylglutamate synthetase deficiency.	2010-03-18	2010	Novel Drug Product	As an adjunctive therapy for the treatment of acute hyperammonemia due to the deficiency of the hepatic enzyme N-acetylglutamate synthase (NAGS) and as manitenance therapy for chronic hyperammonemia due to NAGS deficiency	Metabolism and Endocrinology	P	drug
Clolar	clofarabine	Treatment of acute lymphoblastic leukemia	2004-12-28	2004	Novel Drug Product	Treatment of pediatric patients 1 to 21 years old with relapsed or refractory acute lymphoblastic leukemia after at least two prior regimens	Oncology	P	drug
Imlygic	talimogene laherparepvec	Treatment of stage IIb-stage IV melanoma	2015-10-27	2015	Novel Drug Product	Indicated for the local treatment of unresectable cutaneous, subcutaneous, and nodal lesions in patients with melanoma recurrent after initial surgery	Oncology	S	biologic
Panhematin	Hemin	Amelioration of recurrent attacks of acute intermittent porphyria (AIP) temporarily related to the menstrual cycle in susceptible women and similar symptoms which occur in other patients with AIP, porphyria variegata and hereditary coproporphyria.	1983-07-20	1983	Novel Drug Product	Amelioration of recurrent attacks of acute intermittent porphyria (AIP)	Hematology	n/a	biologic
Chemet	Succimer	Treatment of lead poisoning in children.	1991-01-30	1991	Novel Drug Product	Treatment of lead poisoning in children	Antidotes and Medical Countermeasures	n/a	drug
Yescarta	axicabtagene ciloleucel	Treatment of diffuse large B-cell lymphoma.	2017-10-18	2017	Novel Drug Product	Treatment of adult patients with relapsed or refractory large B-cell lymphoma after two or more lines of systemic therapy, including diffuse large B-cell lymphoma (DLBCL) not otherwise specified, primary mediastinal large B-cell lymphoma, high-grade B-cel	Oncology	P	biologic
Orlaam	Levomethadyl acetate hydrochloride	Treatment of heroin addicts suitable for maintenance on opiate agonists.	1993-07-09	1993	Novel Drug Product	For the management of opiate dependence.	Addiction	P	drug
Kymriah (Tisagenlecleucel)	tisagenlecleucel	For the treatment of Acute Lymphoblastic Leukemia	2017-08-30	2017	Novel Drug Product	Treatment of patients up to 25 years of age with B-cell precursor acute lymphoblastic leukemia (ALL) that is refractory or in second or later relapse	Oncology	P	biologic
Haegarda	C1-esterase-inhibitor, human, pasteurized	Prevention and/or treatment of acute attacks of hereditary angioedema.	2017-06-22	2017	Novel Drug Product	For routine prophylaxis to prevent Hereditary Angioedema (HAE) attacks in adolescent and adult patients.	Rheumotology & Immunology	S	biologic
Vonvendi	von Willebrand factor (rhVWF) recombinant	Treatment of von Willebrand disease.	2015-12-08	2015	Novel Drug Product	Indicated for on-demand treatment and control of bleeding episodes in adults diagnosed with von Willebrand disease (VWD)	Hematology	S	biologic
Varizig	Varicella Zoster Immune Globulin (Human)	Passive immunization for the treatment of exposed, susceptible individuals who are at risk of complications from varicella	2012-12-20	2012	Novel Drug Product	Post exposure prophylaxis of varicella in high risk individuals to reduce the severity of varicella	Infectious Disease	P	biologic
Betapace	Sotalol HCl	1. Treatment of life-threatening ventricular tachyarrhythmias 2. Prevention of life treatening ventricular tachyarrhythmias	1992-10-30	1992	Novel Drug Product	Treatment of life-threatening ventricular tachyarrhythmias	Cardiovascular	P	drug
Vaccinia Immune Globulin (Human) Intravenous	Vaccinia Immune Globulin (Human) Intravenous	Treatment of severe complications from the smallpox vaccine	2005-02-18	2005	Novel Drug Product	Treatment and modification of aberrant infections induced by vaccinia virus that include its accidental implantation in eyes (except in cases of isolated keratitis), mouth, or other areas where vaccinia infection would constitute a special hazard; eczema	Antidotes and Medical Countermeasures	P	biologic
Yescarta	axicabtagene ciloleucel	Treatment of follicular lymphoma.	2017-10-18	2017	Novel Drug Product	Treatment of adult patients with relapsed or refractory large B-cell lymphoma after two or more lines of systemic therapy, including diffuse large B-cell lymphoma (DLBCL) not otherwise specified, primary mediastinal large B-cell lymphoma, high-grade B-cel	Oncology	P	biologic
Winrho Sd	Rho (D) immune globulin intravenous (human)	Treatment of immune thrombocytopenic purpura.	1995-03-24	1995	Novel Drug Product	Treatment of adults and children with chronic and acute immune thrombocytopenic purpura.	Hematology	unknown	biologic
Respigam	Respiratory syncytial virus immune globulin (Human)	Prophylaxis of respiratory syncytial virus lower respiratory tract infections in infants and young children at high risk of RSV disease.	1996-01-18	1996	Novel Drug Product	For the prevention of serious lower respiratory tract infections caused by RSV in children less than 24 months of age with bronchopulmonary dysplasia or a history of prematurity (less than or equal to 35 weeks gestation).	Infectious Disease	S	biologic
Kcentra	prothrombin complex concentrate (human)	Treatment of patients needing urgent reversal of Vitamin K antagonist therapy for treatment of major bleeding and/or surgical procedures	2013-04-29	2013	Novel Drug Product	Urgent reversal of acquired coagulation factor deficiency induced by Vitamin K antagonist (VKA, e.g., warfarin) therapy in adult patients with acute major bleeding.	Hematology	S	biologic
Ceprotin	Protein C concentrate	For replacement therapy in congenital protein C deficiency for the prevention and treatment of thrombosis, pulmonary emboli, and purpura fulminans.	2007-03-30	2007	Novel Drug Product	Prevention and treatment of venous thrombosis and purpura fulminans	Hematology	P	biologic
Pentaspan	Pentastarch	As an adjunct in leukapheresis to improve the harvesting and increase the yield of leukocytes by centrifugal means.	1987-05-19	1987	Novel Drug Product	adjunct in leukapheresis to improve the harvesting and increase the yield of leukocytes by centrifugal means.	Hematology	n/a	drug
Wilate	Human plasma coagulation Factor VIII and human plasma von Willebrand Factor	Treatment of von Willebrand disease except for surgical and/or invasive procedures in patients with von Willebrand disease in whom desmopressin is either ineffective or contraindicated	2009-12-04	2009	Novel Drug Product	Treatment of spontaneous or trauma-induced bleeding episodes in patients with severe von Willebrand disease (VWD) as well as patients with mild or moderate VWD in whom the use of desmopressin is known or suspected to be ineffective or contraindicated	Hematology	S	biologic
Riastap	human fibrinogen concentrate, pasteurized	Treatment of fibrinogen deficient patients.	2009-01-16	2009	Novel Drug Product	Treatment of acute bleeding episodes in patients with congenital fibrinogen deficiency (afibrinogenemia and hypofibrinogenemia)	Hematology	P	biologic
Rixubis	coagulation factor IX (recombinant)	Prophylactic use to prevent or reduce the frequency of bleeding episodes in patients with hemophilia B (routine prophylaxis in patients where there is no evidence or suspicion of bleeding)	2013-06-26	2013	Novel Drug Product	Adults with Hemophilia B for routine prophylaxis to prevent or reduce the frequency of bleeding episodes.	Hematology	S	biologic
VIGIV	Vaccinia Immune Globulin (Human) Intravenous	Treatment of complications of vaccinia vaccination	2005-05-02	2005	Novel Drug Product	treatment and/or modification of the following conditions, which are complications resulting from smallpox vaccination: Eczema vaccinatum Progressive vaccinia Severe generalized vaccinia Vaccinia infections in individuals who have skin conditions such as	Antidotes and Medical Countermeasures	P	biologic
Myozyme	acid alpha-glucosidase; alglucosidase alfa (Recombinant human)	Treatment of glycogen storage disease type II.	2006-04-28	2006	Novel Drug Product	Myozyme for use in patients with Pompe disease (GAA deficiency). Alglucosidase alfa has been shown to improve ventilator-free survival in patients with infantile onset Pompe disease as compared to an untreated historical control, whereas use of Alphagluco	Metabolism and Endocrinology	P	biologic
Albenza	Albendazole	Treatment of hydatid disease (cystic echinococcosis due to E. granulosus larvae or alveolar echinococcosis due to E. multilocularis larvae).	1996-06-11	1996	Novel Drug Product	Treatment of cystic hydatid disease of the liver, lung, and peritoneum, caused by the larval form of the dog tapeworm, Echinococcus granulosus.	Infectious Disease	P	drug
Albenza	Albendazole	Treatment of neurocysticercosis due to Taenia solium as: 1) chemotherapy of parenchymal, subarachnoidal and racemose (cysts in spinal fluid) neurocysticercosis in symptomatic cases and 2) prophylaxis of epilepsy and other sequelae in asymptomatic neurocys	1996-06-11	1996	Novel Drug Product	Treatment of parenchymal neurocysticercosis due to active lesions caused by larval forms of the pork tapeworm, Taenia solium.	Infectious Disease	P	drug
Proleukin	Aldesleukin	Treatment of metastatic renal cell carcinoma.	1992-05-05	1992	Novel Drug Product	Treatment of adults (>18 years old) with metastatic renal cell carcinoma.	Oncology	n/a	biologic
Alecensa	alectinib	Treatment of ALK-positive non-small cell lung cancer	2015-12-11	2015	Novel Drug Product	Treatment of patients with anaplastic lymphoma kinase (ALK)-positive metastatic non-small cell lung cancer (NSCLC), who have progressed on or are intolerant to crizotinib	Oncology	P	drug
Campath	alemtuzumab	Treatment of chronic lymphocytic leukemia.	2001-05-07	2001	Novel Drug Product	The treatment of patients with B-cell chronic lymphocytic leukemia who have been treated with alkylating agents and who have failed fludarabine therapy.	Oncology	P	biologic
Ceredase	Alglucerase injection	For replacement therapy in patients with Gaucher's disease type I.	1991-04-05	1991	Novel Drug Product	Long-term enzyme replacement therapy for children, adolescents and adult patients with a confirmed diagnosis of Type I Gaucher disease who exhibit signs and symptoms that are severe enough to result in one or more of the following conditions: a) moderate-	Metabolism and Endocrinology	n/a	biologic
Panretin	Alitretinoin	Treatment of AIDS-related Kaposi's sarcoma.	1999-02-02	1999	Novel Drug Product	Topical treatment of cutaneous lesions in patients with AIDS-related Kaposi's sarcoma.	Oncology	P	drug
Lumizyme	acid alpha-glucosidase; alglucosidase alfa (Recombinant human)	Treatment of glycogen storage disease type II.	2010-05-24	2010	Novel Drug Product	Lumizyme for patients 8 years and older with late (non-infantile) onset Pompe disease (GAA deficiency) who do not have evidence of cardiac hypertrophy. The safety and efficacy of Lumizyme (alglucosidase alfa) have not been evaluated in controlled clinical	Metabolism and Endocrinology	P	biologic
Sclerosol	Sterile talc powder	Treatment of malignant pleural effusion.	1997-12-24	1997	Novel Drug Product	Prevention of recurrence of malignant pleural effusions in symptomatic patients.	Oncology	P	drug
Letairis	ambrisentan	Treatment of pulmonary arterial hypertension	2007-06-15	2007	Novel Drug Product	Treatment of pulmonary arterial hypertension (WHO group I) in patients with WHO class II or III symptoms to improve exercise capacity and delay clinical worsening	Cardiovascular	P	drug
Alomide	Lodoxamide tromethamine	Treatment of vernal keratoconjunctivitis.	1993-09-23	1993	Novel Drug Product	Treatment of ocular disorders referred to by the terms vernal keratoconjunctivitis, vernal conjunctivitis, vernal keratitis.	Ophthalmology	S	drug
Promacta	eltrombopag	Treatment of idiopathic thrombocytopenia purpura	2008-11-20	2008	Novel Drug Product	Treatment of thrombocytopenia in patients with chronic immune (idiopathic) thrombocytopenic purpura who have had an insufficient response to corticosteroids, immunoglobulins, or splenectomy	Hematology	P	drug
Ethyol	Amifostine	For use as a chemoprotective agent for cisplatin in the treatment of advanced ovarian carcinoma.	1995-12-08	1995	Novel Drug Product	To reduce the cumulative renal toxicity associated with repeated administration of cisplatin in patients with advanced ovarian cancer.	Antidotes and Medical Countermeasures	P	drug
ProAmatine	Midodrine HCl	Treatment of patients with symptomatic orthostatic hypotension.	1996-09-06	1996	Novel Drug Product	Treatment of symptomatic orthostatic hypotension.	Cardiovascular	P	drug
Zavesca	miglustat	Treatment of Gaucher disease.	2003-07-31	2003	Novel Drug Product	Treatment of mild to moderate Type I Gaucher disease in adults for whom enzyme replacement therapy is not a therapeutic option (e.g., due to constraints such as allergy, hypersensitivity, or poor venous access).	Metabolism and Endocrinology	S	drug
Impavido	miltefosine	Treatment of leishmaniasis.	2014-03-19	2014	Novel Drug Product	Treatment of visceral leishmaniasis due to Leishmania donovani; cutaneous leishmaniasis due to Leishmania braziliensis, Leishmania guyanensis, and Leishmania panamensis; and mucosal leishmaniasis due to Leishmania braziliensis.	Infectious Disease	P	drug
Luxturna	voretigene neparvovec	Treatment of inherited retinal dystrophy due to biallelic RPE65 gene mutations	2017-12-19	2017	Novel Drug Product	an adeno-associated virus vector-based gene therapy indicated for the treatment of patients with confirmed biallelic RPE65 mutation-associated retinal dystrophy. Patients must have viable retinal cells determinded by a treating physician	Ophthalmology	P	biologic
Yescarta	axicabtagene ciloleucel	Treatment of primary mediastinal B-cell lymphoma.	2017-10-18	2017	Novel Drug Product	Treatment of adult patients with relapsed or refractory large B-cell lymphoma after two or more lines of systemic therapy, including diffuse large B-cell lymphoma (DLBCL) not otherwise specified, primary mediastinal large B-cell lymphoma, high-grade B-cel	Oncology	P	biologic
Nexavar	Sorafenib	Treatment of renal cell carcinoma.	2005-12-20	2005	Novel Drug Product	Treatment of patients with advanced renal cell carcinoma	Oncology	P	drug
Hexalen	Altretamine	Treatment of advanced adenocarcinoma of the ovary.	1990-12-26	1990	Novel Drug Product	Single agent palliative treatment of patients with persistent or recurrent ovarian cancer following first-line therapy with a cisplatin and/or alkylating agent based combination.	Oncology	n/a	drug
Sirturo	bedaquiline	Treatment of active tuberculosis	2012-12-28	2012	Novel Drug Product	Part of combination therapy in adults (greater than or equal to 18 years) with pulmonary multi-drug resistant tuberculosis (MDR-TB).	Infectious Disease	P	drug
Coagadex	Human factor X	Treatment of hereditary factor X deficiency	2015-10-20	2015	Novel Drug Product	Treatment of patients with hereditary Factor X Deficiency	Hematology	P	biologic
Coartem	artemether/lumefantrine	For the treatment of infections due to Plasmodium falciparum or mixed infections including P. falciparum.	2009-04-07	2009	Novel Drug Product	Treatment of malaria in patients of 5 kg bodyweight or above with acute, uncomplicated malaria due to Plasmodium falciparum or mixed infections including P. falciparum	Infectious Disease	P	drug
Strensiq	Asfotase alfa	Treatment of hypophosphatasia	2015-10-23	2015	Novel Drug Product	For the treatment of patients with perinatal/infantile-and juvenile-onset hypophosphatasia (HPP)	Metabolism and Endocrinology	P	biologic
Mepron	Atovaquone	Treatment of AIDS associated Pneumocystis Carinii Pneumonia.	1992-11-25	1992	Novel Drug Product	For the acute oral treatment of mild to moderate Pneumocystis carinii pneumonia in patients who are intolerant to trimethoprim-sulfamethoxazole.	Infectious Disease	P	drug
Tretten	coagulation factor XIII A-subunit (recombinant)	Prophylaxis of bleeding associated with congential factor XIII deficiency	2013-12-23	2013	Novel Drug Product	Routine prophylaxis of bleeding in patients with congenital Factor XIII A-subunit deficiency.	Hematology	S	biologic
Novoseven	Coagulation factor VIIa (recombinant)	Treatment of bleeding episodes in hemophilia A or B patients with inhibitors to Factor VIII or Factor IX.	1999-03-25	1999	Novel Drug Product	Treatment of bleeding episodes in hemophilia A or B patients with inhibitors to Factor VIII or Factor IX.	Hematology	P	biologic
Alprolix	Coagulation factor IX (recombinant), Fc fusion protein	Control and prevention of hemorrhagic episodes in patients with hemophilia B (congenital factor IX deficiency or Christmas disease)	2014-03-28	2014	Novel Drug Product	Adults and children with Hemophilia B for control and prevention of bleeding episodes, perioperative management, and routine prophylaxis to prevent or reduce the frequency of bleeding episodes.	Hematology	S	biologic
Gilotrif	afatinib	Treatment of epidermal growth factor receptor (EGFR) mutation-positive non-small cell lung cancer (NSCLC).	2013-07-12	2013	Novel Drug Product	First-line treatment of patients with metastatic non-small cell lung cancer (NSCLC) whose tumors have epidermal growth factor receptor (EGFR) exon 19 deletions or exon 21 (L858R) substitution mutations as detected by an FDA-approved test.	Oncology	P	drug
Trasylol	Aprotinin	For prophylactic use to reduce perioperative blood loss and the homologous blood transfusion requirement in patients undergoing cardiopulmonary bypass surgery in the course of repeat coronary artery bypass graft surgery, and in selected cases of primary c	1993-12-29	1993	Novel Drug Product	prophylactic use to reduce perioperative blood loss and the need for transfusion in patients undergoing cardiopulmonary bypass in the course of repeat coronary artery bypass grafting (CABG) surgery. Also where the risk of bleeding is especially high or t	Hematology	P	drug
Simulect	Basiliximab	Prophylaxis of solid organ rejection.	1998-05-12	1998	Novel Drug Product	Prophylaxis of acute organ rejection in patients receiving renal transplantation when used as part of an immunosuppressive regimen that includes cyclosporine and corticosteroids.	Transplant	P	biologic
Apokyn	Apomorphine HCl	Treatment of the on-off fluctuations associated with late-stage Parkinson's disease.	2004-04-20	2004	Novel Drug Product	For the acute, intermittent treatment of hypomobility, "off" episodes ("end-of-dose-wearing-off" and unpredictable :on/off" episodes) associated with advanced Parkinson's disease	Neurology	P	drug
Nulojix	belatacept	Prophylaxis of organ rejection in renal allograft recipients	2011-06-15	2011	Novel Drug Product	Prophylaxis of organ rejection in adult patients receiving kidney transplants	Transplant	S	biologic
Beleodaq	Belinostat	Treatment of peripheral T-cell lymphoma (PTCL).	2014-07-03	2014	Novel Drug Product	Treatment of patients with relapsed or refractory peripheral T-cell lymphoma	Oncology	P	drug
Benefix	Coagulation Factor IX (recombinant)	Treatment of hemophilia B.	1997-02-11	1997	Novel Drug Product	For the control and prevention of hemorrhagic episodes in patients with hemophilia B (congenital factor IX deficiency and Christmas disease), including control and prevention of bleeding in surgical settings.	Hematology	P	biologic
Treanda	Bendamustine hydrochloride	Treatment of chronic lymphocytic leukemia	2008-03-20	2008	Novel Drug Product	Treatment of patients with chronic lymphocytic leukemia	Oncology	P	drug
AlphaNine SD	Coagulation Factor IX (human)	For use as replacement therapy in patients with hemophilia B for the prevention and control of bleeding episodes, and during surgery to correct defective hemostasis.	1990-12-31	1990	Novel Drug Product	hemophilia B for the prevention and control of bleeding episodes, and during surgery to correct defective hemostasis	Hematology	n/a	biologic
Ucephan	Benzoate and phenylacetate	For adjunctive therapy in the prevention and treatment of hyperammonemia in patients with urea cycle enzymopathy due to carbamylphosphate synthetase, ornithine, transcarbamylase, or argininosuccinate synthetase deficiency.	1987-12-23	1987	Novel Drug Product	adjunctive therapy in the prevention and treatment of hyperammonemia in patients with urea cycle enzymopathies involving partial or complete deficiencies of carbamylphosphate synthetase, ornithine transcarbamylase or argininosuccinate synthetase	Metabolism and Endocrinology	n/a	drug
Survanta	Beractant	Treatment of neonatal respiratory distress syndrome	1991-07-01	1991	Novel Drug Product	Prevention of RDS (hyaline membrane disease) in	Pulmonary	n/a	drug
Survanta	Beractant	Treatment of neonatal respiratory distress syndrome	1991-07-01	1991	Novel Drug Product	Treatment of ("rescue") of premature infants with RDS confirmed by x-ray and requiring mechanical ventilation	Pulmonary	n/a	drug
Vidaza	azacitidine	Treatament of myelodysplastic syndromes	2004-05-19	2004	Novel Drug Product	Treatment of patients with the following myelodysplastic syndrome subtypes: refractory anemia or refractory anemia with ringed sideroblasts (if accompanied by neutropenia or thrombocytopenia and requiring transfusions), refractory anemia with excess blast	Oncology	P	drug
DTPA	Diethylenetriaminepentaacetic acid (DTPA)	Treatment of patients with known or suspected internal contamination with plutonium, americium, or curium to increase the rates of elimination.	2004-08-11	2004	Novel Drug Product	Treatment of internal contamination with plutonium, americium or curium	Antidotes and Medical Countermeasures	P	drug
Juxtapid	lomitapide	Treatment of homozygous familial hypercholesterolemia	2012-12-21	2012	Novel Drug Product	Adjunct to a low-fat diet and other lipid-lowering treatments, including LDL apheresis where available, to reduce low-density lipoprotein cholesterol (LDL-C), total cholesterol (TC), apolipoprotein B (apo B), and non-high-density lipoprotein cholesterol (	Metabolism and Endocrinology	S	drug
Orkambi	lumacaftor/ivacaftor	Treatment of cystic fibrosis	2015-07-02	2015	Novel Drug Product	Treatment of cystic fibrosis in patients age 12 years and older who are homozygous for F508del mutation in the CFTR gene	Pulmonary	P	drug
Corifact	factor XIII concentrate (human)	Treatment of congenital factor XIII deficiency	2011-02-17	2011	Novel Drug Product	For the routine prophylactic treatment of congenital factor XIII deficiency	Hematology	P	biologic
Opsumit	macitentan	Treatment of pulmonary arterial hypertension	2013-10-18	2013	Novel Drug Product	Treatment of pulmonary arterial hypertension (PAH, WHO Group 1) to delay disease progression. Disease progression included: death, initiation of intravenous (IV) or subcutaneous prostanoids, or clinical worsening of PAH (decreased 6-minute walk distance,	Cardiovascular	S	drug
Digibind	immune FAB (Ovine)	Treatment of potentially life threatening digitalis intoxication in patients who are refractory to management by conventional therapy.	1986-04-22	1986	Novel Drug Product	Treatment of potentially life threatening digitalis intoxication	Antidotes and Medical Countermeasures	n/a	biologic
Mycobutin	Rifabutin	Prevention of disseminated Mycobacterium avium complex disease in patients with advanced HIV infection.	1992-12-23	1992	Novel Drug Product	Prevention of disseminated Mycobacterium avium complex disease in patients with advanced HIV infections.	Infectious Disease	P	drug
Tracleer	Bosentan	Treatment of pulmonary arterial hypertension.	2001-11-20	2001	Novel Drug Product	Treatment of pulmonary arterial hypertension.	Cardiovascular	S	drug
Bosulif	bosutinib	Treatment of chronic myelogenous leukemia	2012-09-04	2012	Novel Drug Product	Treatment of adult patients with chronic, accelerated or blast phase Philadelphia chromosome-positive (Ph+) chronic myelogenous leukemia (CML) with resistance, or intolerance to prior therapy	Oncology	S	drug
Trisenox	Arsenic trioxide	Treatment of acute promyelocytic leukemia.	2000-09-25	2000	Novel Drug Product	For induction of remission and consolidation in patients with acute promyelocytic leukemia (APL) who are refractory to, or have relapsed from, retinoid and anthracycline chemotherapy, and whose APL is characterized by the presence of the t(15;17) transloc	Oncology	P	drug
Botox	Botulinum toxin type A	Treatment of strabismus and blepharospasms	1989-12-29	1989	Novel Drug Product	Treatment of strabismus associated with dystonia in adults (patients 12 years of age and above)	Neurology	n/a	biologic
Cystadane	Betaine	Treatment of homocystinuria.	1996-10-25	1996	Novel Drug Product	Treatment of homocystinuria to decrease elevated homocysteine blood levels.	Metabolism and Endocrinology	P	drug
Unituxin	dinutuximab	Treatment of neuroblastoma	2015-03-10	2015	Novel Drug Product	For use in combination with granulocyte-macrophage colony-stimulating factor (GM-CSF), interleukin-2 (IL-2) and 13-cis-retinoic acid (RA), for the treatment of pediatric patients with high-risk neuroblastoma who achieve at least a partial response to prio	Oncology	P	biologic
Pulmozyme	Dornase alfa	To reduce mucous viscosity and enable the clearance of airway secretions in patients with cystic fibrosis.	1993-12-30	1993	Novel Drug Product	In conjunction with standard therapies in the management of cystic fibrosis patients to reduce the frequency of respiratory infections requiring parenteral antibiotics and to improve pulmonary function.	Pulmonary	P	biologic
Northera	droxidopa	Treatment of neurogenic symptomatic orthostatic hypotension in patients with primary autonomic failure, dopamine-beta-hydroxylase deficiency, and nondiabetic autonomic neuropathy.	2014-02-18	2014	Novel Drug Product	Treatment of orthostatic dizziness, lightheadedness, or the "feeling that you are about to black out" in adult patients with symptomatic neurogenic orthostatic hypotension caused by primary autonomic failure (Parkinson's disease, multiple system atrophy,	Cardiovascular	P	drug
Nipent	Pentostatin for injection	Treatment of hairy cell leukemia.	1991-10-11	1991	Novel Drug Product	Single agent treatment for adult patients with alpha-interferon-refractory hairy cell leukemia.	Oncology	n/a	drug
Esbriet	pirfenidone	Treatment of idiopathic pulmonary fibrosis	2014-10-15	2014	Novel Drug Product	Treatment of idiopathic pulmonary fibrosis	Pulmonary	P	drug
Spherusol	coccidioidin SD Skin Test Antigen	For the diagnosis of Coccidioidomycosis	2011-07-29	2011	Novel Drug Product	For the detection of delayed type hypersensitivity to C. immitis in individuals, 18-64 years of age, with a history of pulmonary coccidioidomy-cosis	Infectious Disease	S	biologic
Agrylin	Anagrelide	Treatment of essential thrombocythemia.	1997-03-14	1997	Novel Drug Product	Treatment of patients with essential thrombocythemia to reduce the elevated platelet count and the risk of thrombosis and to ameliorate associated symptoms.	Hematology	P	drug
Atnativ	Antithrombin III (human)	For the treatment of patients with hereditary antithrombin III deficiency in connection with surgical or obstetrical procedures or when they suffer from thromboembolism.	1989-12-13	1989	Novel Drug Product	Replacement therapy for AT-III deficiency	Hematology	n/a	biologic
Botox	Botulinum toxin type A	Treatment of strabismus and blepharospasms	1989-12-29	1989	Novel Drug Product	Treatment of blepharospasm associated with dystonia in adults (patients 12 years of age and above)	Neurology	n/a	biologic
Banzel	rufinamide	Treatment of Lennox-Gastaut Syndrome.	2008-11-14	2008	Novel Drug Product	Adjunctive therapy of seizures associated with Lennox-Gastaut syndrome.	Neurology	S	drug
Elitek	rasburicase	Treatment of malignancy-associated or chemotherapy-induced hyperuricemia.	2002-07-12	2002	Novel Drug Product	Initial management of plasma uric acid levels in pediatric patients with leukemia,lymphoma, and solid tumor malignancies who are receiving anti-cancer therapy expected to result in tumor lysis and subsequent elevation of plasma uric acid.	Metabolism and Endocrinology	S	biologic
Abthrax	raxibacumab	Treatment of anthrax	2012-12-14	2012	Novel Drug Product	Treatment of inhalation anthrax due to Bacillus anthracis in combination with appropriate antibacterial drugs,	Antidotes and Medical Countermeasures	P	biologic
Priftin	Rifapentine	Treatment of pulmonary tuberculosis.	1998-06-22	1998	Novel Drug Product	Treatment of pulmonary tuberculosis	Infectious Disease	P	drug
Arcalyst	Rilonacept	Treatment of CIAS1-Associated Periodic Syndromes	2008-02-27	2008	Novel Drug Product	Treatment of Cryopyrin-Assisted Periodic Syndromes (CAPS)	Rheumotology & Immunology	P	biologic
Rilutek	Riluzole	Treatment of amyotrophic lateral sclerosis.	1995-12-12	1995	Novel Drug Product	Treatment of patients with amyotrophic lateral sclerosis. Riluzole extends survival and/or time to tracheostomy.	Neurology	P	drug
Adempas	riociguat	Treatment of chronic thromboembolic pulmonary hypertension	2013-10-08	2013	Novel Drug Product	Treatment of adults with persistent/recurrent chronic thromboembolic pulmonary hypertension (CTEPH) WHO Group 4, after surgical treatment, or inoperable CTEPH, to improve exercise capacity and WHO functional class	Cardiovascular	P	drug
Adempas	riociguat	Treatment of pulmonary arterial hypertension.	2013-10-08	2013	Novel Drug Product	Treatment of adults with pulmonary arterial hypertension (PAH) WHO Group 1, to improve exercise capacity, WHO functional class and to delay clinical worsening.	Cardiovascular	P	drug
Rituxan	rituximab	Treatment of non-Hodgkin's B-cell lymphoma	1997-11-26	1997	Novel Drug Product	relapsed or refractory low-grade or follicular CD20 positive B-Cell non-Hodgkins Lymphoma	Oncology	P	biologic
Istodax	romidepsin	Treatment of non-Hodgkin T-cell lymphomas	2009-11-05	2009	Novel Drug Product	Treatment of cutaneous T-cell lymphoma (CTCL) in patients who have received at least one prior systemic therapy	Oncology	S	drug
Neumega	Oprelvekin	Prevention of severe chemotherapy-induced thrombocytopenia.	1997-11-25	1997	Novel Drug Product	Prevention of severe chemotherapy-induced thrombocytopenia.	Hematology	S	biologic
Rubraca	rucaparib	Treatment of ovarian cancer	2016-12-19	2016	Novel Drug Product	As monotherapy for the treatment of patients with deleterious BRCA mutation (germline and/or somatic) associated advanced ovarian cancer who have been treated with two or more chemotherapies	Oncology	P	drug
Photofrin	Porfimer sodium	For the photodynamic therapy of patients with primary or recurrent obstructing (either partially or completely) esophageal carcinoma.	1995-12-27	1995	Novel Drug Product	Photodynamic therapy with PHOTOFRIN for the palliation of patients with completely obstructing esophageal cancer, or of patients with partially obstructing esophageal cancer who cannot be satisfactorily treated with Nd:YAG laser therapy.	Oncology	P	drug
Jakafi	ruxolitinib	Treatment of myelofibrosis	2011-11-16	2011	Novel Drug Product	Treatment of patients with intermediate or high-risk myelofibrosis, including primary myelofibrosis, post-polycythemia vera myelofibrosis and post-essential thrombocythemia myelofibrosis	Hematology	P	drug
Sucraid	Sacrosidase	Treatment of congenital sucrase-isomaltase deficiency	1998-04-09	1998	Novel Drug Product	Oral replacement therapy of the genetically determined sucrase deficiency, which is part of congenital sucrease-isomaltase deficiency.	Metabolism and Endocrinology	P	drug
Kuvan	sapropterin	Treatment of hyperphenylalaninemia	2007-12-13	2007	Novel Drug Product	Indicated to reduce blood phenylalanine (Phe) levels in patients with hyperphenylalaninemia (HPA) due to tetrahydrobiopterin- (BH4-) responsive Phenylketonuria (PKU). Kuvan is to be used in conjunction with a Phe-restricted diet.	Metabolism and Endocrinology	P	drug
Leukine	sargramostim	Treatment of neutropenia associated with bone marrow transplant, for the treatment of graft failure and delay of engraftment, and for the promotion of early engraftment.	1991-03-05	1991	Novel Drug Product	Treatment of neutropenia associated with bone marrow transplant	Hematology	n/a	biologic
Oncoscint	Satumomab pendetide	Detection of ovarian carcinoma.	1992-12-29	1992	Novel Drug Product	For determining the extent and location of extraphepatic malignant disease in patients with known colorectal and ovarian cancer.	Medical Imaging	S	biologic
Kanuma	sebelipase alfa	Treatment of lysosomal acid lipase deficiency	2015-12-08	2015	Novel Drug Product	Indicated for the treatment of patients with a diagnosis of Lysosomal Acid Lipase (LAL) deficiency	Metabolism and Endocrinology	P	biologic
Eldepryl	Selegiline HCl	As an adjuvant to levodopa and carbidopa treatment of idiopathic Parkinson's disease (paralysis agitans), postencephalitic Parkinsonism, and symptomatic Parkinsonism.	1989-06-05	1989	Novel Drug Product	treatment of idiopathic Parkinson's disease	Neurology	n/a	drug
Uptravi	selexipag	Treatment of pulmonary arterial hypertension	2015-12-21	2015	Novel Drug Product	For use of Uptravi (Selexipag) Tablets, 200, 400, 600, 800, 1000, 1200, 1400, and 1600 mcg for treatment of pulmonary arterial hypertension (PAH, WHO Group I) to reduce the risks of disease progression and hospitalization for PAH	Cardiovascular	S	drug
Sylvant	siltuximab	Treatment of Castleman's disease	2014-04-23	2014	Novel Drug Product	Treatment of patients with multicentric Castleman's disease (MCD) who are human immunodeficiency virus (HIV) negative and human herpesvirus-8 (HHV-8) negative.	Hematology	P	biologic
Buphenyl	sodium phenylbutyrate	Treatment of urea cycle disorders: carbamylphosphate synthetase deficiency, ornithine transcarbamylase deficiency, and arginiosuccinic acid synthetase deficiency.	1996-04-30	1996	Novel Drug Product	Adjunctive therapy in the chronic managment of patients with urea cycle disorders involving deficiencies of carbamylphosphate synthetase, ornithine transcarbamylase, or argininosuccinic acid synthetase.	Metabolism and Endocrinology	P	drug
Nplate	romiplostim	Treatment of immune thrombocytopenic purpura	2008-08-22	2008	Novel Drug Product	Treatment of thrombocytopenia in patients with chronic immune (idiopathic) thrombocytopenic purpura (ITP) who have had an insufficient response to corticosteroids, immunoglobulins, or splenectomy	Hematology	P	biologic
Pentam 300	Pentamidine isethionate	Treatment of Pneumocystis carinii pneumonia.	1984-10-16	1984	Novel Drug Product	Treatment of Pneumocystis carinii pneumonia.	Infectious Disease	n/a	drug
Tagrisso	osimertinib	Treatment of epidermal growth factor receptor mutation-positive non-small cell lung cancer	2015-11-13	2015	Novel Drug Product	For treatment of patients with metastatic epidermal growth factor receptor (EGFR) T790M mutation-positive non-small cell lung cancer (NSCLC), as detected by an FDA-approved test, who have progressed on or after EGFR TKI therapy	Oncology	P	drug
Xyrem	oxybate	Treatment of narcolepsy.	2002-07-17	2002	Novel Drug Product	Treatment of cataplexy associated with narcolepsy	Neurology	P	drug
Farydak	panobinostat	Treatment of multiple myeloma	2015-02-23	2015	Novel Drug Product	Treatment of patients with multiple myeloma who have received at least 2 prior regimens, including bortezomib and an immunomodulatory agent	Oncology	P	drug
Natpara	parathyroid hormone	Treatment of hypoparathyroidism	2015-01-23	2015	Novel Drug Product	An adjunct to calcium and vitamin D to control hypocalcemia in patients with hypoparathyroidism	Metabolism and Endocrinology	S	biologic
Signifor	pasireotide	Treatment of Cushing's disease	2012-12-14	2012	Novel Drug Product	Treatment of adult patients with Cushing's disease for whom pituitary surgery is not an option or has not been curative	Metabolism and Endocrinology	S	drug
Adagen	Pegademase bovine	For enzyme replacement therapy for ADA deficiency in patients with severe combined immunodeficiency.	1990-03-21	1990	Novel Drug Product	enzyme replacement therapy for ADA deficiency in patients with severe combined immunodeficiency.	Metabolism and Endocrinology	n/a	biologic
Oncaspar	Pegaspargase	Treatment of acute lymphocytic leukemia.	1994-02-01	1994	Novel Drug Product	Combination chemotherapy for the treatment of patients with acute lymphoblastic leukemia who are hypersensitive to native forms of L-asparaginase.	Oncology	S	biologic
Krystexxa	pegloticase	To control the clinical consequences of hyperuricemia in patients with severe gout in whom conventional therapy is contraindicated or has been ineffective.	2010-09-14	2010	Novel Drug Product	Treatment of chronic gout in adult patients refractory to conventional treatment	Rheumotology & Immunology	P	biologic
Somavert	Pegvisomant	Treatment of acromegaly.	2003-03-25	2003	Novel Drug Product	Treatment of acromegaly in patients who have had an inadequate response to surgery and/or radiation therapy and/or other medical therapies, or for whom these therapies are not appropriate	Metabolism and Endocrinology	P	biologic
Ellence	Epirubicin	Treatment of breast cancer.	1999-09-15	1999	Novel Drug Product	Component of adjuvant therapy in patients with evidence of axillary node tumor involvement following resection of primary breast cancer.	Oncology	P	drug
Cyramza	ramucirumab	Treatment of gastric cancer	2014-04-21	2014	Novel Drug Product	Treatment of advanced gastric cancer or gastro-esophageal junction adenocarcinoma, as a single-agent after prior fluoropyrimidine-or platinum-containing therapy.	Oncology	P	biologic
Lartruvo	olaratumab	Treatment of soft tissue sarcoma	2016-10-19	2016	Novel Drug Product	In combination with doxorubicin, for the treatment of adult patients with soft tissue sarcoma (STS) with a histologic subtype for which an anthracycline-containing regimen is appropriate and which is not amenable to curative treatment with radiotherapy or	Oncology	P	biologic
Folotyn	pralatrexate	Treatment of T-cell lymphoma	2009-09-25	2009	Novel Drug Product	Treatment of patients with relapsed or refractory peripheral T-cell lymphoma	Oncology	P	drug
Elmiron	Pentosan polysulfate sodium	Treatment of interstitial cystitis.	1996-09-26	1996	Novel Drug Product	Relief of bladder pain or discomfort associated with interstitial cystitis.	Urology	S	drug
Mozobil	plerixafor	For use to improve the yield of progentor cells in the apheresis product for subsequest stem cell transplantation following myelosuppressive or myeloablative chemotherapy	2008-12-15	2008	Novel Drug Product	To enhance mobilization of hematopoietic stem cells to the peripheral blood for collection and subsequent autologous transplantation in patients with lymphoma and multiple myeloma	Hematology	P	drug
Pomalyst	pomalidomide	Treatment of multiple myeloma	2013-02-08	2013	Novel Drug Product	Treatment of patients with multiple myeloma who have received at least two prior therapies including lenalidomide and bortezomib and have demonstrated disease progression on or within 60 days of completion of the last therapy.	Oncology	S	drug
Iclusig	ponatinib	Treatment of chronic myeloid leukemia	2012-12-14	2012	Novel Drug Product	Treatment of adult patients with chronic phase, accelerated phase, or blast phase chronic myeloid leukemia (CML) that is resistant or intolerant to prior tyrosine kinase inhibitor therapy.	Oncology	P	drug
Vpriv	velaglucerase-alfa	Treatment of Gaucher disease	2010-02-26	2010	Novel Drug Product	Treatment of Type I Gaucher Disease	Metabolism and Endocrinology	P	biologic
Zelboraf	vemurafenib	Treatment of patients with IIb to Stage IV melanoma positive for the BRAF(v600) mutation	2011-08-17	2011	Novel Drug Product	Treatment of unresectable or metastatic melanoma with the BRAFV600E mutation as detected by an FDA-approved test.	Oncology	P	drug
Venclexta	venetoclax	Treatment of chronic lymphocytic leukemia	2016-04-11	2016	Novel Drug Product	Treatment of patients with chronic lymphocytic leukemia (CLL) with 17p deletion, as detected by an FDA approved test, who have received at least one prior therapy	Oncology	P	drug
Sabril	vigabatrin	Treatment of infantile spasms.	2009-08-21	2009	Novel Drug Product	For infantile spasms (IS) - 1 month to 2 years of age.	Neurology	S	drug
Iclusig	ponatinib	Treatment of Philadelphia chromosome-positive acute lymphoblastic leukemia (Ph+ALL)	2012-12-14	2012	Novel Drug Product	Treatment of adult patients with Philadelphia chromosome positive acute lymphoblastic leukemia (Ph+ALL) that is resistant or intolerant to prior tyrosine kinase inhibitor therapy.	Oncology	P	drug
Hetlioz	tasimelteon	Non-24-hour sleepwake disorder in blind individuals without light perception	2014-01-31	2014	Novel Drug Product	Treatment of non-24-hour sleep-wake disorder	Neurology	P	drug
Alimta	pemetrexed disodium	Treatment of malignant pleural mesothelioma	2004-02-04	2004	Novel Drug Product	Treatment of patients with malignant pleural mesothelioma whose disease is either unresectable or who are otherwise not candidates for curative surgery	Oncology	P	drug
Idhifa	enasidenib	Treatment of acute myelogenous leukemia	2017-08-01	2017	Novel Drug Product	Treatment of adult patients with relapsed or refractory acute myeloid leukemia with an isocitrate dehydrogenase-2 (IDH2) mutation as detected by an FDA-approved test	Oncology	P	drug
Protropin	Somatrem for injection	1. Long-term treatment of children who have growth failure due to a lack of adequate endogenous growth hormone secretion (prevalence 15,000) 2. Treatment of short stature associated with Turner's syndrome (prevalence 8000).	1985-10-17	1985	Novel Drug Product	Long-term treatment of children who have growth failure due to a lack of adequate endogenous growth hormone and Treatment of short stature associated with Turner's syndrome	Metabolism and Endocrinology	n/a	biologic
Cyklokapron	tranexamic acid	For use in patients with congenital coagulopathies undergoing surgical procedures, e.g. dental extractions	1986-12-30	1986	Novel Drug Product	Treatment of patients with hemophilia for short term use (2 to 8 days) before and after tooth extraction to reduce or prevent hemorrhage abd reduce the need for replacement therapy	Hematology	n/a	drug
Cytovene	ganciclovir Sodium	Treatment of cytomegalovirus retinitis in immunocompromised patients with AIDS.	1986-12-29	1986	Novel Drug Product	Treatment of CMV retinitis in immunocompromised patients, including patients with acquired immunodeficiency syndrome (AIDS).	Ophthalmology	n/a	drug
Ganite	gallium nitrate	Treatment of hypercalcemia of malignancy.	1991-01-17	1991	Novel Drug Product	Treatment of hypercalcemia of malignancy	Metabolism and Endocrinology	n/a	drug
Bavencio	avelumab	Treatment of merkel cell carcinoma.	2017-03-23	2017	Novel Drug Product	Treatment of adults and pediatric patients 12 years and older with metastatic Merkel cell carcinoma	Oncology	P	biologic
Zejula	niraparib	Treatment of ovarian cancer	2017-03-27	2017	Novel Drug Product	Indicated for maintenance treatment of adult patients with recurrent epithelial ovarian, fallopian tube, or primary peritoneal cancer who are in a complete or partial response to platinum-based chemotherapy	Oncology	P	drug
Austedo	deutetrabenazine	Treatment of Huntington's Disease	2017-04-03	2017	Novel Drug Product	Treatment of chorea associated with Huntington’s disease	Neurology	S	drug
Brineura	cerliponase alfa	Treatment of neuronal ceroid lipofuscinosis type 2	2017-04-27	2017	Novel Drug Product	To slow the progression of loss of ambulation in symptomatic pediatric patients 3 years of age and older with late infantile neuronal ceroid lipofuscinosis type 2 (CLN2), also known as tripeptidyl peptidase 1 (TPP1) deficiency.	Neurology	P	biologic
Alunbrig	brigatinib	Treatment of anaplastic lymphoma kinase-positive (ALK+), c-ros 1 oncogene positive (ROS1+), or epidermal growth factor receptor positive (EGFR+) non-small cell lung cancer (NSCLC).	2017-04-28	2017	Novel Drug Product	Treatment of patients with anaplastic lymphoma kinase (ALK)-positive metastatic non-small cell lung cancer (NSCLC) who have progressed on or are intolerant to crizotinib	Oncology	P	drug
Rydapt	midostaurin	Treatment of mastocytosis	2017-04-28	2017	Novel Drug Product	Treatment of adult patients with aggressive systemic mastocytosis (ASM), systemic mastocytosis with associated hematological neoplasm (SM-AHN), or mast cell leukemia (MCL)	Oncology	P	drug
Retrovir	zidovudine	Treatment of AIDS	1987-03-19	1987	Novel Drug Product	Management of certain adult patients with symptomatic HIV infection (AIDS and advanced ARC) who have a history of cytologically confirmed Pneumocytis carinii pneumonia (PCP) or an absolute CD4 (T4 helper/induccer) lymphocyte count of less than 200/mm in t	Infectious Disease	n/a	drug
Radicava	edaravone	Treatment of amyotrophic lateral sclerosis	2017-05-05	2017	Novel Drug Product	Treatment of amyotrophic lateral sclerosis (ALS)	Neurology	S	drug
Hivid	Zalcitabine	Treatment of AIDS.	1992-06-19	1992	Novel Drug Product	Combination therapy with zidovudine is indicated for the treatment of adult patients with advanced HIV infection (CD4 count < 300) who have demonstrated malignant clinical or immunologic deterioration.	Infectious Disease	n/a	drug
Besponsa	inotuzumab ozogamicin	Treatment of B-cell acute lymphoblastic leukemia	2017-08-17	2017	Novel Drug Product	Treatment of adults with relapsed or refractory B-cell precursor acute lymphoblastic leukemia (ALL)	Oncology	P	biologic
n/a	benznidazole	Treatment of Chagas disease	2017-08-29	2017	Novel Drug Product	for use in children ages 2 to 12 years old with Chagas disease	Infectious Disease	P	drug
Aliqopa	copanlisib	Treatment of follicular lymphoma	2017-09-14	2017	Novel Drug Product	Treatment of adult patients with relapsed follicular lymphoma who have received at least two prior systemic therapies	Oncology	P	drug
Calquence	acalabrutinib	Treatment of mantle cell lymphoma.	2017-10-31	2017	Novel Drug Product	treatment of adult patients with mantle cell lymphoma (MCL) who have received at least one prior therapy	Oncology	P	drug
Prevymis	letermovir	Prevention of human cytomegalovirus viremia and disease in at risk populations	2017-11-08	2017	Novel Drug Product	Prophylaxis of cytomegalovirus (CMV) infection and disease in adult CMV-seropositive recipients [R+] of an allogeneic hematopoietic stem cell transplant (HSCT).	Rheumotology & Immunology	P	drug
Mepsevii	Vestronidase alfa	Treatment of c VII (MPS VII, Sly Syndrome)	2017-11-15	2017	Novel Drug Product	pediatric and adult patients for the treatment of Mucopolysaccharidosis type VII (MPS VII, Sly syndrome)	Metabolism and Endocrinology	P	biologic
Hemlibra	Emicizumab	Treatment of hemophilia A	2017-11-16	2017	Novel Drug Product	routine prophylaxis to prevent or reduce the frequency of bleeding episodes in adult and pediatric patients with hemophilia A	Hematology	P	biologic
Macrilen	Macimorelin acetate	Diagnosis of growth hormone deficiency	2017-12-20	2017	Novel Drug Product	diagnosis of adult growth hormone deficiency	Metabolism and Endocrinology	S	drug
Emflaza	deflazacort	Treatment of Duchenne muscular dystrophy	2017-02-09	2017	Novel Drug Product	Treatment of Duchenne Muscular Dystrophy in patients 5 years of age and older	Neurology	P	drug
Xermelo	telotristat etiprate	Treatment of carcinoid syndrome in patients with neuroendocrine tumors	2017-02-28	2017	Novel Drug Product	Treatment of carcinoid syndrome diarrhea in combination with somatostatin analog (SSA) therapy in adults inadequately controlled by SSA therapy.	Gastroenterology	P	drug
Rydapt	midostaurin	Treatment of acute myeloid leukemia	2017-04-28	2017	Novel Drug Product	Treatment of adult patients with newly diagnosed acute myeloid leukemia (AML) that is FLT3 mutation-positive as detected by an FDA approved test, in combination with standard cytarabine and daunorubicin induction and cytarabine consolidation.	Oncology	P	drug
Fareston	Toremifene	Hormonal therapy of metastatic carcinoma of the breast.	1997-05-29	1997	Novel Drug Product	Treatment of metastatic breast cancer in postmenopausal women with estrogen positive or receptor unknown tumors.	Oncology	S	drug
Keytruda	pembrolizumab	Treatment of Stage IIB through IV malignant melanoma	2014-09-04	2014	Novel Drug Product	Treatment of patients with unresectable or metastatic melanoma and disease progression following ipilimumab and, if BRAF V600 mutation positive, a BRAF inhibitor.	Oncology	P	biologic
Gattex	teduglutide [rDNA origin]	Treatment of short bowel syndrome.	2012-12-21	2012	Novel Drug Product	Treatment of adult patients with short bowel syndrome (SBS) who are dependent on parenteral support	Gastroenterology	S	biologic
Temodar	temozolomide	Treatment of recurrent malignant glioma.	1999-08-11	1999	Novel Drug Product	Treatment of adult patients with refractory anaplastic astrocytoma, i.e., patients at first relapse who have experienced disease progression on a drug regimen containing a nitrosourea and procarbazine	Oncology	P	drug
Torisel	Temsirolimus	Treatment of renal cell carcinoma	2007-05-30	2007	Novel Drug Product	Treatment of advanced renal cell carcinoma	Oncology	P	drug
Vumon	Teniposide	Treatment of refractory childhood acute lymphocytic leukemia.	1992-07-14	1992	Novel Drug Product	Induction therapy in patients with refractory childhood acute lymphoblastic leukemia when used in combination with other approved anticancer agents.	Oncology	n/a	drug
Parathar	Teriparatide	Diagnostic agent to assist in establishing the diagnosis in patients presenting with clinical and laboratory evidence of hypocalcemia due to either hypoparathyroidism or pseudohypoparathyroidism.	1987-12-23	1987	Novel Drug Product	diagnosis in patients presenting with clinical and laboratory evidence of hypocalcemia due to either hypoparathyroidism or pseudohypoparathyroidism.	Metabolism and Endocrinology	n/a	drug
Xenazine	Tetrabenazine	Treatment of Huntington's disease	2008-08-15	2008	Novel Drug Product	Treatment of chorea associated with Huntington's disease	Neurology	P	drug
Thalomid	Thalidomide	Treatment of erythema nodosum leprosum.	1998-07-16	1998	Novel Drug Product	Acute treatment of the cutaneous manifestations of moderate to severe erythema nodosum leprosum (ENL) and as maintenance therapy for prevention and suppression of the cutaneous manifestations of ENL recurrences.	Rheumotology & Immunology	P	drug
Thyrogen	Thyrotropin alfa	As an adjunct in the diagnosis of thyroid cancer.	1998-11-30	1998	Novel Drug Product	As an adjunctive diagnostic tool for serum thyroglobulin (Tg) testing with or without radioiodine imaging in the follow-up of patients with thyroid cancer.	Oncology	P	biologic
Tindamax	Tinidazole	Treatment of amebiasis	2004-05-17	2004	Novel Drug Product	Treatment of intestinal amebiasis and amebic liver abcess caused by E. histolytica in both adults and pediatric patients older than three years of age. It is not indicated for the treatment of asymptomatic cyst passage.	Infectious Disease	S	drug
Zometa, Zabel	Zoledronate	Treatment of tumor induced hypercalcemia.	2001-08-20	2001	Novel Drug Product	Treatment of hypercalcemia of malignancy.	Metabolism and Endocrinology	P	drug
Thiola	Tiopronin	Prevention of cystine nephrolithiasis in patients with homozygous cystinuria.	1988-08-11	1988	Novel Drug Product	Prevention of cystine nephrolithiasis in patients with homozygous cystinuria	Renal	n/a	drug
Elelyso	Taliglucerase alfa	Treatment of Gaucher's disease	2012-05-01	2012	Novel Drug Product	Use as long-term enzyme replacement therapy in patients with Type 1 Gaucher disease	Metabolism and Endocrinology	S	biologic
Bexxar	Tositumomab and iodine I 131 tositumomab	Treatment of non-Hodgkin's B-cell lymphoma.	2003-06-27	2003	Novel Drug Product	Treatment of patients with CD20 positive, follicular, non-Hodgkin's lymphoma, with and without transformation, whose disease is refractory to Rituximab and has relapsed following chemotherapy	Oncology	P	biologic
Yondelis	trabectedin	Treatment of soft tissue sarcoma	2015-10-23	2015	Novel Drug Product	For the treatment of patients with unresectable or metastatic liposarcoma or leiomyosarcoma who received a prior anthracycline-containing regimen	Oncology	P	drug
Mekinist	trametinib	Treatment of Stage IIb through Stage IV melanoma	2013-05-29	2013	Novel Drug Product	Treatment of patients with unresectable or metastatic melanoma with BRAF V600E or V600K mutations as detected by an FDA approved test.	Oncology	S	drug
Remodulin	treprostinil	Treatment of pulmonary arterial hypertension.	2002-05-21	2002	Novel Drug Product	Treatment of pulmonary arterial hypertension.	Cardiovascular	P	drug
Syprine	Trientine HCl	Treatment of patients with Wilson's disease who are intolerant, or inadequately responsive to penicillamine.	1985-11-08	1985	Novel Drug Product	Treatment of patients with Wilson's disease	Metabolism and Endocrinology	n/a	drug
Neutrexin	Trimetrexate glucuronate	Treatment of Pneumocystis carinii pneumonia in AIDS patients.	1993-12-17	1993	Novel Drug Product	Concurrent leucovorin administration as an alternative therapy for the treatment of moderate to severe PCP in immunocompromised patients who are intolerant of, or are refractory to, trimethoprim sulfamethoxazole.	Infectious Disease	P	drug
Xiruden	uridine triacetate	Treatment of hereditary orotic aciduria	2015-09-04	2015	Novel Drug Product	Treatment of hereditary orotic aciduria	Metabolism and Endocrinology	P	drug
Valstar	Valrubicin	Treatment of carcinoma in situ of the urinary bladder.	1998-09-25	1998	Novel Drug Product	For intravesical therapy of BCG-refractory carcinoma in situ of the urinary bladder in patients for whom immediate cystectomy would be associated with unacceptable morbidity or mortality.	Oncology	P	drug
Caprelsa	vandetanib	Treatment of patients with follicular thyroid carcinoma, medullary thyroid carcinoma, anaplastic thyroid carcinoma, and locally advanced and metastatic papillary thyroid carcinoma	2011-04-06	2011	Novel Drug Product	Treatment of asymptomatic or progressive medullary thyroid cancer in patients with unresectable locally advanced or metastatic disease	Oncology	P	drug
Zolinza	vorinostat	Treatment of T-cell non-Hodgkin's lymphoma	2006-10-06	2006	Novel Drug Product	Treatment of cutaneous manifestations in patients with cutaneous T-cell lymphoma (CTCL) who have progressive, persistant or recurrent disease on or following two systemic therapies.	Oncology	P	drug
Tindamax	tinidazole	Treatment of giardiasis	2004-05-17	2004	Novel Drug Product	Treatment of giardiasis caused by G. duodenalis (also termed G. lamblia) in both adults and pediatric patients older than three years of age	Infectious Disease	S	drug
Adreview	Iobenguane I 123	For the diagnosis of neuroblastomas	2008-09-19	2008	Novel Drug Product	To be used in the detection of primary or metastatic pheochromocytomas or neuroblastomas as an adjunct to other diagnostic tests	Medical Imaging	P	drug
Zydelig	idelalisib	Treatment of follicular lymphoma	2014-07-23	2014	Novel Drug Product	Relapsed follicular B-cell non-Hodgkin lymphoma (FL) in patients who have received at least two prior systemic therapies.	Oncology	S	drug
Zydelig	idelalisib	Treatment of chronic lymphocytic leukemia and small lymphocytic lymphoma	2014-07-23	2014	Novel Drug Product	(1) Relapsed chronic lymphocytic leukemia (CLL), in combination with rituximab, in patients for whom rituximab alone would be considered appropriate therapy due to other co-morbidities; and (2) Relapsed small lymphocytic lymphoma (SLL) in patients who hav	Oncology	P	drug
Elaprase	idursulfase	Long term enzyme replacement therapy for patients with mucopolysaccharidosis II (Hunter Syndrome)	2006-07-24	2006	Novel Drug Product	Indicated for patients with Hunter syndrome (mucopolysaccharidosis II, MPS II). Idursulfase has been shown to improve walking capacity in these patients	Metabolism and Endocrinology	P	biologic
Ifex	Ifosfamide	Treatment of testicular cancer.	1988-12-30	1988	Novel Drug Product	In combination with certain other approved antineoplastic agents, for third line chemotherapy in the treatment of germ cell testicular cancer.	Oncology	n/a	drug
Ventavis	Iloprost inhalation solution	Treatment of pulmonary arterial hypertension	2004-12-29	2004	Novel Drug Product	Treatment of pulmonary arterial hypertension (WHO Group I) in patients with NYHA Class III or IV symptoms	Cardiovascular	P	drug
Gleevec	imatinib mesylate	Treatment of chronic myelogenous leukemia	2001-05-10	2001	Novel Drug Product	Treatment of patients with chronic myeloid leukemia (CML) in blast crisis, accelerated phase, or in chronic phase after failure of interferon-alpha therapy	Oncology	P	drug
Cerezyme	Imiglucerase	Replacement therapy in patients with types I, II, and III Gaucher's disease.	1994-05-23	1994	Novel Drug Product	Enzyme replacement therapy in patients with type I Gaucher's disease.	Metabolism and Endocrinology	P	biologic
Remicade	infliximab	Treatment of Crohn's disease	1998-08-24	1998	Novel Drug Product	Treatment of moderately to severely active Crohn's disease for the reduction of the signs and symptoms, in patients who have an inadequate response to conventional therapies; and treatment of patients with fistulizing Crohn's disease for the reduction in	Gastroenterology	P	biologic
Avonex	Interferon beta-1a	Treatment of multiple sclerosis.	1996-05-17	1996	Novel Drug Product	Treatment of relapsing forms of multiple sclerosis to slow the accumulation of physical disability and decrease the frequency of clinical exacerbations.	Neurology	P	biologic
Revlimid	lenalidomide	Treatment of myelodysplastic syndromes	2005-12-27	2005	Novel Drug Product	Treatment of patients with transfusion dependant anemia due to low or intermediate-1 risk myelodysplastic syndromes associated with a deletion 5 q cytogenetic abnormality with or without additional cytogenetic abnormalities	Oncology	P	drug
Actimmune	Interferon gamma-1b	Treatment of chronic granulomatous disease.	1990-12-20	1990	Novel Drug Product	Treatment of chronic granulomatous disease	Rheumotology & Immunology	n/a	biologic
Extraneal	Icodextrin 7.5% with Electrolytes Peritoneal Dialysis Solution	Treatment of those patients having end stage renal disease and requiring peritoneal dialysis treatment.	2002-12-20	2002	Novel Drug Product	For use as a single daily exchange for the long (8-16 hour) dwell during continuous ambulatory peritoneal dialysis (CAPD) or automated peritoneal dialysis (APD) for the management of chronic renal failure.	Renal	S	drug
Adreview	Iobenguane I 123	For the diagnosis of pheochromocytomas	2008-09-19	2008	Novel Drug Product	To be used in the detection of primary or metastatic pheochromocytomas or neuroblastomas as an adjunct to other diagnostic tests	Medical Imaging	P	drug
Xalkori	crizotinib	Treatment of ALK-positive, MET-positive, or ROS-positive non-small cell lung cancer	2016-03-11	2016	Novel Drug Product	metastatic NSCLC whose tumors are ROS1-positive	Oncology	P	drug
Radiogardase	iron(III)-hexacyanoferrate(II)	Treatment of patients with known or suspected internal contamination with radioactive or non-radioactive cesium or thallium	2003-10-02	2003	Novel Drug Product	Treatment of patients with known or suspected internal contamination with radioactive cesium and/or radioactive or non-radioactive thallium to increase their rates of elimination	Medical Imaging	P	drug
Cresemba	isavuconazonium sulfate	Treatment of invasive aspergillosis	2015-03-06	2015	Novel Drug Product	Treatment of invasive aspergillosis in patienst 18 years of age and older	Infectious Disease	P	drug
Cresemba	isavuconazonium sulfate	Treatment of zygomycosis	2015-03-06	2015	Novel Drug Product	Treatment of invasive mucormycosis in patients 18 years of age and older	Infectious Disease	P	drug
Kalydeco	ivacaftor	Treatment of patients with cystic fibrosis	2012-01-31	2012	Novel Drug Product	Treatment of cystic fibrosis (CF) in patients age 6 years and older who have a G551D mutation in the CFTR gene.	Pulmonary	P	drug
Ninlaro	ixazomib citrate	Treatment of multiple myeloma	2015-11-20	2015	Novel Drug Product	Use in combination with lenalidomide and dexamethasone for the treatment of patients with multiple myeloma who have received at least one prior therapy	Oncology	P	drug
Somatuline Depot	lanreotide acetate	Treatment for acromegly	2007-08-30	2007	Novel Drug Product	Long-term treatment of acromegalic patients who have had an inadequate response to or cannot be treated with surgery and/or radiotherapy	Metabolism and Endocrinology	S	drug
Aldurazyme	laronidase	Treatment of patients with mucopolysaccharidosis-I.	2003-04-30	2003	Novel Drug Product	Treatment for patients with Hurler and Hurler-Scheie forms of Mucopolysaccharidosis I (MPS I) and for patients with the Scheie form who have moderate to severe symptoms	Metabolism and Endocrinology	P	biologic
Betaseron	Interferon beta-1b	Treatment of multiple sclerosis.	1993-07-23	1993	Novel Drug Product	In ambulatory patients with relapsing-remitting multiple sclerosis to reduce the frequency of clinical exacerbations.	Neurology	P	biologic
Netspot	Gallium [Ga-68]-N-[(4,7,10-Tricarboxymethyl-1,4,7,10-tetraazacyclododec-1-yl)acetyl]-D-phenylalanyl-L-cysteinyl-L-tyrosyl-D-tryptophanyl-L-lysyl-L-threoninyl-L-cysteinyl-L-threonine-cyclic(2-7)disulfide	Diagnostic for the clinical management of neuroendocrine tumors	2016-06-01	2016	Novel Drug Product	For use after radiolabeling with Ga 68, with positron emission tomography (PET) for localization of somatostatin receptor positive neuroendocrine tumors (NETs) in adult and pediatric patients.	Medical Imaging	P	drug
Epogen	Epoetin alfa	Treatment of anemia associated with end stage renal disease.	1989-06-01	1989	Novel Drug Product	anemia associated with chronic renal failure	Hematology	n/a	biologic
Flolan	Epoprostenol	Treatment of primary pulmonary hypertension.	1995-09-20	1995	Novel Drug Product	Long-term intravenous treatment of primary pulmonary hypertension in NYHA Class III and Class IV patients.	Cardiovascular	P	drug
Erwinase	Erwinia L-asparaginase	Treatment of acute lymphocytic leukemia.	2011-11-18	2011	Novel Drug Product	Treatment of patients with acute lymphoblastic leukemia (ALL) who have developed hypersensitivity to E. coli-derived asparaginase.	Oncology	P	biologic
Exondys 51	eteplirsen	Treatment of Duchenne Muscular Dystrophy.	2016-09-19	2016	Novel Drug Product	Treatment of Duchenne muscular dystrophy (DMD) in patients who have a confirmed mutation of the DMD gene that is amenable to exon 51 skipping	Neurology	P	drug
Ethamolin	Ethanolamine oleate	Treatment of patients with esophageal varices that have recently bled, to prevent rebleeding.	1988-12-22	1988	Novel Drug Product	Treatment of patients with esophageal varices	Gastroenterology	n/a	drug
Repatha	evolocumab	Treatment of homozygous familial hypercholesterolemia	2015-08-27	2015	Novel Drug Product	As an adjunct to diet and other LDL-lowering therapies (e.g., statins, ezetimibe, LDL apheresis) in patients with HoFH who require additional lowering of LDL-C.	Metabolism and Endocrinology	S	biologic
Aromasin	Exemestane	Treatment of advanced breast cancer in postmenopausal women whose disease has progressed following tamoxifen therapy.	1999-10-21	1999	Novel Drug Product	Treatment of advanced breast cancer in postmenopausal women whose disease has progressed following tamoxifen therapy.	Oncology	S	drug
Felbatol	Felbamate	Treatment of Lennox-Gastaut syndrome.	1993-07-29	1993	Novel Drug Product	As adjunctive therapy in the treatment of partial and generalized seizures associated with the Lennox-Gastaut syndrome in children.	Neurology	P	drug
Fludara	Fludarabine phosphate	Treatment of chronic lymphocytic leukemia (CLL), including refractory CLL.	1991-04-18	1991	Novel Drug Product	Treatment of adult patients with B-cell chronic lymphocytic leukemia	Oncology	n/a	drug
Praxbind	idarucizumab	To reverse the anticoagulant effect of dabigatran due to uncontrolled life-threatening bleeding requiring urgent intervention or a need to undergo an emergency surgery/urgent invasive procedure	2015-10-16	2015	Novel Drug Product	For use in patients treated with Pradaxa® when reversal of the anticoagulant effects of dabigatran is needed for emergency surgery/urgent procedures and in life-threatening or uncontrolled bleeding	Hematology	P	biologic
Cerebyx	Fosphenytoin	For the acute treatment of patients with status epilepticus of the grand mal type.	1996-08-05	1996	Novel Drug Product	For the control of generalized convulsive status epilepticus.	Neurology	S	drug
Idamycin	Idarubicin HCl for injection	Treatment of acute myelogenous leukemia, also referred to as acute nonlymphocytic leukemia.	1990-09-27	1990	Novel Drug Product	Treatment of acute myelogenous leukemia	Oncology	n/a	drug
Mylotarg	Gemtuzumab ozogamicin	Treatment of acute myeloid leukemia	2000-05-17	2000	Novel Drug Product	Treatment of patients with CD33 positive acute myeloid leukemia in first relapse who are 60 years of age or older and who are not considered candidates for cytotoxic chemotherapy	Oncology	P	biologic
Copaxone	Glatiramer acetate	Treatment of multiple sclerosis.	1996-12-20	1996	Novel Drug Product	For reduction of the frequency of relapses in patients with relapsing-remitting multiple sclerosis.	Neurology	S	drug
Voraxaze	glucarpidase	Treatment of patients at risk of methotrexate toxicity	2012-01-17	2012	Novel Drug Product	Treatment of toxic (>1 micromole/liter) plasma methotrexate concentrations in patients with delayed methotrexate clearance due to impaired renal function.	Oncology	P	biologic
Nutrestore	L-glutamine	For use with human growth hormone in the treatment of short bowel syndrome (nutrient malabsorption from the gastrointestinal tract resulting from an inadequate absorptive surface).	2004-06-10	2004	Novel Drug Product	Treatment of short bowel syndrome in patients receiving specialized nutritional support when used in conjunction with a recombinant human growth hormone that is approved for this indication.	Gastroenterology	S	drug
Halfan	Halofantrine	Treatment of mild to moderate acute malaria caused by susceptible strains of P. falciparum and P. vivax.	1992-07-24	1992	Novel Drug Product	Treatment of adults who can tolerate oral medication and who have mild to moderate malaria caused by Plasmodium falciparum or Plasmodium vivax.	Infectious Disease	n/a	drug
Supprelin Injection	Histrelin acetate	Treatment of central precocious puberty.	1991-12-24	1991	Novel Drug Product	Treatment of central precocious puberty.	Metabolism and Endocrinology	n/a	drug
Zevalin	ibritumomab tiuxetan	Treatment of B-cell non-Hodgkin's lymphoma.	2002-02-19	2002	Novel Drug Product	Treatment of patients with relapsed or refractory low-grade, follicular, or transformed B-cell non-Hodgkin's lymphoma, including patients with Rituximab (Rituxan?) refractory follicular non-Hodgkin?s lymphoma	Oncology	P	biologic
Imbruvica	ibrutinib	Treatment of mantle cell lymphoma	2013-11-13	2013	Novel Drug Product	Treatment of patients with mantle cell lymphoma (MCL) who have received at least one prior therapy	Oncology	P	drug
Firazyr	icatibant	Treatment of angioedema	2011-08-25	2011	Novel Drug Product	Treatment of acute attacks of hereditary angioedema in adults 18 years of age and older	Rheumotology & Immunology	P	drug
Yervoy	ipilimumab	Treatment of high risk Stage II, Stage III, and Stage IV melanoma	2011-03-25	2011	Novel Drug Product	Treatment of unresectable or metastatic melanoma	Oncology	P	biologic
Antizol	Fomepizole	Treatment of methanol or ethylene glycol poisoning.	1997-12-04	1997	Novel Drug Product	As an antidote to ethylene glycol (antifreeze) poisoning, or for use in suspected ethylene glycol ingestion.	Antidotes and Medical Countermeasures	S	drug
Anthim	obiltoxaximab	Treatment of exposure to B. anthracis spores	2016-03-18	2016	Novel Drug Product	Treatment of adult and pediatric patients with inhalational anthrax due to Bacillus anthracis in combination with appropriate antibacterial drugs and for prophylaxis of inhalational anthrax when alternative therapies are not available or are not appropria	Antidotes and Medical Countermeasures	S	biologic
Provigil	Modafinil	Treatment of excessive daytime sleepiness in narcolepsy.	1998-12-24	1998	Novel Drug Product	Improve wakefulness in patients with excessive daytime sleepiness associated with narcolepsy.	Neurology	S	drug
Alinia	Nitazoxanide	Treatment of cryptosporidiosis.	2002-11-22	2002	Novel Drug Product	Treatment of diarrhea caused by Cryptosporidium parvum and Giardia lamblia	Infectious Disease	P	drug
Opdivo	nivolumab	Treatment of Stage IIb to IV melanoma	2014-12-22	2014	Novel Drug Product	Treatment of patients with unresectable or metastatic melanoma and disease progression following ipilimumab and, if BRAF V600 mutation positive, a BRAF inhibitor	Oncology	P	biologic
Naglazyme	N-acetylgalactosamine-4-sulfatase, recombinant human	Treatment of mucopolysaccharidosis Type VI (Maroteaux-Lamy syndrome).	2005-05-31	2005	Novel Drug Product	For patients with mucopolysaccharidosis VI. Galsulfase has been shown to improve walking and stair-climbing capacity.	Metabolism and Endocrinology	P	biologic
Trexan	Naltrexone HCl	For blockade of the pharmacological effects of exogenously administered opioids as an adjunct to the maintenance of the opioid-free state in detoxified formerly opioid-dependent individuals.	1984-11-30	1984	Novel Drug Product	blockade of the effects of exogenously administered opioids	Addiction	n/a	drug
Inomax	Nitric oxide	Treatment of persistent pulmonary hypertension in the newborn.	1999-12-23	1999	Novel Drug Product	In conjunction with ventilatory support and other appropriate agents, in the treatment of term and near-term (>34 weeks) neonates with hypoxic respiratory failure associated with clinical or echocardiographic evidence of pulmonary hypertension, where it i	Cardiovascular	P	drug
Portrazza	necitumumab	Treatment of squamous non-small cell lung cancer	2015-11-24	2015	Novel Drug Product	Use in combination with gemcitabine and cisplatin, for first-line treatment of patients with metastatic, squamous, non-small cell lung cancer. PORTRAZZA is not indicated for treatment of non-squamous, non-small cell lung cancer	Oncology	S	biologic
Lenvima	lenvatinib	Treatment of follicullar, medullary, anaplastic, and metastatic or locally advanced papillary thyroid cancer	2015-02-13	2015	Novel Drug Product	Treatment of patients with locally recurrent or metastatic, progressive, radioactive iodine refractory differentiated thyroid cancer	Oncology	P	drug
Novantrone	Mitoxantrone	Treatment of acute myelogenous leukemia, also referred to as acute nonlymphocytic leukemia.	1987-12-23	1987	Novel Drug Product	Treatment of acute myelogenous leukemia	Oncology	n/a	drug
Arranon	nelarabine	Treatment of acute lymphoblastic leukemia and lymphoblastic lymphoma	2005-10-28	2005	Novel Drug Product	Treatment of patients with T-cell acute lymphoblastic leukemia and T-cell lymphoblastic lymphoma whose disease has not responded to or has relapsed following treatment with at least two chemotherapy regimens	Oncology	P	drug
Spinraza	nusinersen	Treatment of spinal muscular atrophy	2016-12-23	2016	Novel Drug Product	Treatment of spinal muscular atrophy in pediatric and adult patients	Neurology	P	drug
Moctanin	Monooctanoin	For dissolution of cholesterol gallstones retained in the common bile duct.	1985-10-31	1985	Novel Drug Product	dissolution of cholesterol gallstones	Gastroenterology	n/a	drug
Lariam	mefloquine HCL	For use in the treatment of acute malaria due to Plasmodium falciparum and Plasmodium vivax, and for the prophylaxis of Plasmodium falciparum malaria which is resistant to other available drugs	1989-05-02	1989	Novel Drug Product	Treatment of acute malaria due to Plasmodium falciparum and Plasmodium vivax	Infectious Disease	n/a	drug
Tasigna	nilotinib	Treatment of chronic myelogenous leukemia	2007-10-29	2007	Novel Drug Product	For the use for chronic phase (CP) and accelerated phase (AP) Philadelphia chromosome positive chronic myelogenous leukemia (CML) in adult patients resistant to or intolerant to prior therapy that included imatinib.	Oncology	S	drug
Alinia	nitazoxanide	Treatment of intestinal giardiasis	2002-11-22	2002	Novel Drug Product	Treatment of diarrhea caused by Cryptosporidium parvum and Giardia lamblia	Infectious Disease	P	drug
Refludan	Lepirudin	Treatment of heparin-associated thrombocytopenia type II.	1998-03-06	1998	Novel Drug Product	For anticoagulation in patients with heparin-induced thrombocytopenia and associated thromboembolic disease in order to prevent further thromboembolic complications.	Hematology	P	biologic
Synribo	omacetaxine mepesuccinate	Treatment of chronic myelogenous leukemia	2012-10-26	2012	Novel Drug Product	Treatment of adult patients with chronic or accelerated phase chronic myeloid leukemia (CML) with resistance and/or intolerance to two or more tyrosine kinase inhibitors (TKI)	Oncology	S	drug
Prolastin	Alpha1-proteinase inhibitor (human)	For replacement therapy in the alpha-1-proteinase inhibitor congenital deficiency state.	1987-12-02	1987	Novel Drug Product	For chronic replacement therapy of individuals having congenital deficiency of alpha1- proteinase inhibitor with clinically demonstrable panacinar emphysema.	Metabolism and Endocrinology	n/a	biologic
Increlex	Mecasermin	Treatment of growth hormone insensitivity syndrome.	2005-08-30	2005	Novel Drug Product	Long-term treatment of growth failure in children with severe primary IGF-1 deficiency (Primary IGFD) or with growth hormone (GH) gene deletion who have developed neutralizing antibodies to growth hormone.	Metabolism and Endocrinology	P	biologic
Kynamro	mipomersen	Treatment of homozygous familial hypercholesterolemia	2013-01-29	2013	Novel Drug Product	Adjunct to lipid-lowering medications and diet to reduce low density lipoprotein-cholesterol (LDL-C), apolipoprotein B (apo B), total cholesterol (TC), and non-high density lipoprotein-cholesterol (non-HDL-C) in patients with homozygous familial hyperchol	Metabolism and Endocrinology	S	drug
Ocaliva	obeticholic acid	Treatment of primary biliary cirrhosis	2016-05-27	2016	Novel Drug Product	Treatment of primary biliary cholangitis (PBC) in combination with ursodeoxycholic acid (UDCA) in adults with an inadequate response to UDCA, or as monotherapy in adults unable to tolerate UDCA	Metabolism and Endocrinology	P	drug
Gazyva	obinutuzumab	Treatment of chronic lymphocytic leukemia	2013-11-01	2013	Novel Drug Product	Treatment of patients with previously untreated chronic lymphocytic leukemia in combination with chlorambucil.	Oncology	P	biologic
Iplex	mecasermin rinfabate	Treatment of growth hormone insensitivity syndrome (GHIS)	2005-12-12	2005	Novel Drug Product	Treatment of growth failure in children with severe primary IGF-1 deficiency (Primary IGFD) or with growth hormone (GH) gene deletion who have developed neutralizing antibodies to growth hormone	Metabolism and Endocrinology	P	biologic
Lynparza	olaparib	Treatment of ovarian cancer	2014-12-19	2014	Novel Drug Product	Use of as monotherapy for patients with deleterious or suspected deleterious germline BRCA mutated (as detected by an FDA-approved test) advanced ovarian cancer who have been treated with three or more prior lines of chemotherapy	Oncology	P	drug
Lariam	mefloquine HCL	For use in the treatment of acute malaria due to Plasmodium falciparum and Plasmodium vivax, and for the prophylaxis of Plasmodium falciparum malaria which is resistant to other available drugs	1989-05-02	1989	Novel Drug Product	Prophylaxis of Plasmodium falciparum malaria which is resistant to other available drugs	Infectious Disease	n/a	drug
Arzerra	ofatumumab	Treatment of chronic lymphocytic leukemia	2009-10-26	2009	Novel Drug Product	Treatment of chronic lymphocytic leukemia (CLL) refractory to alemtuzumab and fludarabine	Oncology	P	biologic
Orfadin	Nitisinone (oral suspension)	Treatment of tyrosinemia type 1.	2002-01-18	2002	Novel Drug Product	Adjunctive therapy to dietary restriction of tyrosine and phenylalanine in the treatment of hereditary tyrosinemia type 1	Metabolism and Endocrinology	P	drug
Ofev	nintedanib	Treatment of patients with idiopathic pulmonary fibrosis.	2014-10-15	2014	Novel Drug Product	Treatment of idiopathic pulmonary fibrosis	Pulmonary	P	drug
Colcrys	colchicine	Treatment of familial Mediterranean fever	2009-07-29	2009	New Formulation or Route of Administration	Treatment of familial Mediterranean feverColcrys is now the first drug that's been FDA-approved to treat FMF	Rheumotology & Immunology	S	drug
Makena	hydroxyprogesterone caproate	Prevention of preterm birth in singleton pregnancies	2011-02-03	2011	New Formulation or Route of Administration	To reduce the risk of preterm birth in women with singleton pregnancy who have a history of singleton spontaneous preterm birth	Reproductive	P	drug
Thyroshield	Potassium Iodide Oral Solution	For use as a thyroid blocking agent in pediatric patients exposed to radiactive iodine	2005-01-12	2005	New Formulation or Route of Administration	For use as a thyroid blocking agent in pediatric patients exposed to radiactive iodine	Antidotes and Medical Countermeasures	n/a	drug
Qualaquin	quinine Sulfate	Treatment of malaria	2005-08-12	2005	New Formulation or Route of Administration	Treatment of uncomplicated Plasmodium falciparum malaria	Infectious Disease	S	drug
Sulfadiazine	Sulfadiazine	For use in combination with pyrimethamine for the treatment of Toxoplasma gondii encephalitis in patients with and without AIDS.	1994-07-29	1994	New Formulation or Route of Administration	Toxoplasmosis, as adjunctive with pyrimethamine	Infectious Disease	S	drug
Nebupent	Pentamidine isethionate	Prevention of Pneumocystis carinii pneumonia in patients at high risk of developing this disease.	1989-06-15	1989	New Formulation or Route of Administration	Prevention of Pneumocystis carinii pneumonia	Infectious Disease	n/a	drug
Nithiodote	sodium nitrite and sodium thiosulfate	Treatment of known or suspected cyanide poisoning	2011-01-14	2011	New Formulation or Route of Administration	For sequential use for the treatment of cyanide poisoning that is judged to be life-threatening	Antidotes and Medical Countermeasures	P	drug
Normocarb Hf	biocarbonate infusate	Use in the management of patients undergoing continuous renal replacement therapy with hemofiltration	2006-07-26	2006	New Formulation or Route of Administration	Use as a replacement solution in Continuous Renal Replacement Therapy (CRRT) to replace water and to correct electrolytes and acid-base imbalances in adults and children	Renal	S	drug
Ascor	ascorbic acid	Treatment of scurvy	2017-10-02	2017	New Formulation or Route of Administration	for the treatment of scurvy in adult and pediatric patients age 5 months and older for whom oral administration is not possible, insufficient or contraindicated	Metabolism and Endocrinology	S	drug
Zirgan	ganciclovir	Treatment of acute herpetic keratitis (dendritic and geographic ulcers)	2009-09-15	2009	Secondary Indication	Treatment of acute herpetic keratitis (dendritic ulcers)	Ophthalmology	S	drug
Steritalc	Sterile talc	Treatment of pneumothorax	2017-05-01	2017	Secondary Indication	To decrease the recurrence of pneumothorax in adults.	Pulmonary	S	drug
Gleolan	5-aminolevulinic acid	Visualization of malignant tissue during surgery for malignant glioma (WHO grades III and IV)	2017-06-06	2017	Secondary Indication	Optical imaging agent indicated in patients with glioma (suspected World Health Organization Grades III or IV on preoperative imaging) as an adjunct for the visualization of malignant tissue during surgery	Medical Imaging	P	drug
Triptodur	triptorelin pamoate	Treatment of central precocious puberty	2017-06-29	2017	Secondary Indication	Treatment of pediatric patients 2 years of age and older with central precocious puberty	Metabolism and Endocrinology	S	drug
Vyxeos	Cytarabine:daunorubicin liposome injection	Treatment of acute myeloid leukemia	2017-08-03	2017	Secondary Indication	Treatment of adults with newly-diagnosed therapy-related acute myeloid leukemia (t-AML) or AML with myelodysplasia-related changes (AML-MRC)	Oncology	P	drug
Gocovri	Amantadine hydrochloride	Treatment of levodopa-induced dyskinesia	2017-08-24	2017	Secondary Indication	treatment of dyskinesia in patients with Parkinson's disease receiving levodopa-based therapy with or without concomitant dopminergic medications	Neurology	S	drug
Membraneblue	Trypan blue	Selectively staining epiretinal membranes during ophthalmic surgical vitrectomy procedures	2009-02-20	2009	Secondary Indication	For use as an aid in ophthalmic surgery by staining the epiretinal membranes during ophthalmic surgical vitrectomy procedures, facilitating removal of the tissue	Ophthalmology	P	drug
Totect	dexrazoxane	Treatment of anthracycline extravasation during chemotherapy	2007-09-06	2007	Secondary Indication	Treatment of extravasation resulting from IV anthracycline chemotherapy	Antidotes and Medical Countermeasures	P	drug
Salagen	Pilocarpine	Treatment of xerostomia induced by radiation therapy for head and neck cancer.	1994-03-22	1994	Secondary Indication	Treatment of symptoms of xerostomia from salivary gland hypofunction caused by radiotherapy for cancer of the head and neck.	Other	P	drug
Didronel	Etidronate disodium (IV)	Treatment of hypercalcemia of malignancy inadequately managed by dietary modification and/or oral hydration.	1987-04-21	1987	Secondary Indication	hypercalcemia of malignancy	Metabolism and Endocrinology	n/a	drug
Ambisome	amphotericin B (Liposomal)	Treatment of visceral leishmaniasis.	1997-08-11	1997	Secondary Indication	Treatment of visceral leishmaniasis.	Infectious Disease	P	drug
Siklos	Hydroxyurea	Treatment of sickle cell disease in patients under 18 years of age	2017-12-21	2017	Secondary Indication	to reduce the frequency of painful crises and to reduce the need for blood transfusions in pediatric patients, 2 years of age and older, with sickle cell anemia with recurrent moderate to severe painful crises	Hematology	P	drug
Tepadina	Thiotepa	Conditioning treatment prior to hematopoietic stem cell transplantation	2017-01-26	2017	Secondary Indication	Indicated for reducing the risk of graft rejection when used in conjunction with high-dose busulfan and cyclophosphamide as a preparative regimen for allogenic hematopoietic progenitor cell transplantation for pediatric patients with class 3 beta-thalasse	Hematology	S	drug
Signifor LAR	pasireotide	Treatment of acromegaly	2014-12-15	2014	Secondary Indication	Treatment of patients with acromegaly who have had an inadequate response to surgery and/or for whom surgery is not an option	Metabolism and Endocrinology	S	drug
Lidoderm	Lidocaine patch 5%	For relief of allodynia (painful hypersensitivity), and chronic pain in postherpetic neuralgia.	1999-03-19	1999	Secondary Indication	treatment of pain in post-herpetic neuralgia	Analgesia	S	drug
Tracleer	bosentan	Treatment of pulmonary arterial hypertension	2017-09-05	2017	Secondary Indication	Treatment of pulmonary arterial hypertension (PAH) (WHO Group 1) in pediatric patients aged 3 years and older with idiopathic or congenital PAH to improve pulmonary vascular resistance (PVR), which is expected to result in an improvement in exercise abili	Cardiovascular	S	drug
Elliotts B Solution	Buffered intrathecal electrolyte/dextrose injection	For use as a diluent in the intrathecal administration of methotrexate and cytarabine for the prevention or treatment meningeal leukemia and lymphocytic lymphoma	1996-09-27	1996	Secondary Indication	For the intrathecal administration of methotrexate and cytarabine for the prevention or treatment of meningeal leukemia and lymphocytic lymphoma.	Oncology	P	drug
Metrogel	Metronidazole (topical)	Treatment of acne rosacea.	1988-11-22	1988	Secondary Indication	topical treatment of acne rosacea.	Dermatology	n/a	drug
Korlym	mifepristone	Treatment of the clinical manifestations of endogenous Cushing's syndrone	2012-02-17	2012	Secondary Indication	for the control of hyperglycemia secondary to hypercortisolism in adult patients with endogenous Cushing's syndrome who have type 2 diabetes mellitus or glucose intolerance and have failed surgery or are not candidates for surgery.	Metabolism and Endocrinology	S	drug
Cafcit	Caffeine	Treatment of apnea of prematurity.	1999-09-21	1999	Secondary Indication	Short term treatment of apnea of prematurity in infants between 28 and less than 33 weeks gestational age.	Pulmonary	P	drug
Phos-Lo	Calcium acetate	Treatment of hyperphosphatemia in end stage renal failure.	1990-12-10	1990	Secondary Indication	hyperphosphatemia in patients with end-stage renal disease	Renal	n/a	drug
Geref	Sermorelin acetate	Treatment of idiopathic or organic growth hormone deficiency in children with growth failure.	1997-09-26	1997	Secondary Indication	Sermorelin Acetate) injection, 0.5 mg base/vial and 1.0 mg base/vial, is indicated for the treatment of idiopathic growth hormone deficiency (GHD) in children with growth failure	Metabolism and Endocrinology	S	drug
Onivyde	irinotecan (liposomal)	Treatment of pancreatic cancer	2015-10-22	2015	Secondary Indication	For use in combination with 5-fluorouracil and leucovorin, for the treatment of patients with metastatic adenocarcinoma of the pancreas that has progressed following gemcitabine-based therapy	Oncology	P	drug
Hemangeol	propranolol	Treatment of proliferating infantile hemangiomas requiring systemic therapy	2014-03-14	2014	Secondary Indication	Treatment of proliferating infantile hemangioma requiring systemic therapy.	Other	S	drug
Mitosol	mitomycin-C	Treatment of refractory glaucoma as an adjunct to ab externo glaucoma surgery.	2012-02-07	2012	Secondary Indication	An adjunct to ab externo glaucoma surgery.	Ophthalmology	P	drug
Urocit-K	Potassium citrate	Prevention of uric acid nephrolithiasis.	1985-08-30	1985	Secondary Indication	Prevention of uric acid nephrolithiasis, . Prevention of calcium renal stones in patients with hypocitraturia, For avoidance of the complication of calcium stone formation in patients with uric lithiasis.	Renal	n/a	drug
Urso 250	Ursodiol	Treatment of patients with primary biliary cirrhosis	1997-12-10	1997	Secondary Indication	treatment of patients with Primary Biliary Cirrhosis (PBC).	Gastroenterology	P	drug
Renacidin	Citric acid, glucono-delta-lactone and magnesium carbonate	Treatment of renal and bladder calculi of the apatite or struvite variety.	1990-10-02	1990	Secondary Indication	use by local irrigation in the dissolution of renal calculi composed of apatite (a calcium carbonate-phosphate compound) or struvite (magnesium ammonium phosphates) in patients who are not candidates for surgical removal of the calculi	Urology	n/a	drug
Endari	L-glutamine	Treatment of sickle cell disease	2017-07-07	2017	Secondary Indication	To reduce the acute complications of sickle cell disease in adult and pediatric patients 5 years of age and older.	Hematology	S	drug
Sulfamylon	Mafenide acetate solution	For use as an adjunctive topical antimicrobial agent to control bacterial infection when used under moist dressings over meshed autografts on excised burn wounds.	1998-06-05	1998	Secondary Indication	adjunctive topical antimicrobial agent to control bacterial infection when used under moist dressings over meshed autografts on excised burn wounds	Infectious Disease	S	drug
Vesanoid	Tretinoin	Treatment of acute promyelocytic leukemia.	1995-11-22	1995	Secondary Indication	Induction of remission in patients with acute promyelocytic leukemia who are refractory to or unable to tolerate anthracycline based cytotoxic chemotherapeutic regimens.	Oncology	P	drug
Neoprofen	Ibuprofen lysine	Treatment of patent ductus arteriosus	2006-04-13	2006	Secondary Indication	For closure of a clinically significant patent ductus arteriosus in premature infants weighing between 500 and 1500 g, who are no more than 32 weeks gestational age when usual medical management (e.g., fluid restriction, diuretics, respiratory support, et	Cardiovascular	P	drug
Gliadel	polifeprosan 20 with carmustine	Treatment of malignant glioma.	1996-09-23	1996	Secondary Indication	As an adjunct to surgery to prolong survival in patients with recurrent glioblastoma multiforme for whom surgical resection is indicated	Oncology	P	drug
Gastrocrom	Cromolyn sodium	Treatment of mastocytosis.	1989-12-22	1989	Secondary Indication	Treatment of mastocytosis	Rheumotology & Immunology	n/a	drug
Serostim	Somatropin [rDNA]	Treatment of AIDS-associated catabolism/weight loss.	1996-08-23	1996	Secondary Indication	Treatment of AIDS wasting or cachexia.	Metabolism and Endocrinology	P	biologic
Opticrom	Cromolyn sodium 4% ophthalmic solution	Treatment of vernal keratoconjunctivitis.	1984-10-03	1984	Secondary Indication	indicated in the treatment of certain allergic occular disorders referred to by the terms vernal keratoconjunctivitis, vernal conjunctivitis, giant papillary conjunctivitis, vernal keratitis, and allergic keratoconjunctivitis	Ophthalmology	n/a	drug
Photrexa Viscous	riboflavin ophthalmic solution & ultraviolet A	Treatment of keratoconus	2016-04-15	2016	Secondary Indication	Treatment of progressive keratoconus	Ophthalmology	P	drug
Cystaran	Cysteamine hydrochloride	Treatment of corneal cystine crystal accumulation in cystinosis patients.	2012-10-02	2012	Secondary Indication	Treatment of corneal cystine crystal accumulation in patients with cystinosis	Ophthalmology	P	drug
Cyanokit	Hydroxocobalamin	Treatment of acute cyanide poisoning	2006-12-15	2006	Secondary Indication	Treatment on known or suspected cyanide poisoning	Antidotes and Medical Countermeasures	P	drug
Galzin	Zinc acetate	Treatment of Wilson's disease.	1997-01-28	1997	Secondary Indication	For maintenance treatment of patients with Wilson's disease who have been initially treated with a chelating agent.	Metabolism and Endocrinology	S	drug
Cuvposa	glycopyrrolate	Treatment of pathologic (chronic moderate to severe) drooling in pediatric patients	2010-07-28	2010	Secondary Indication	To reduce chronic drooling in patients aged 3 - 16 with neurologic conditions associated with problem drooling (e.g. cerebral palsy)	Neurology	S	drug
Provayblue	methylene blue0.5%	Treatment of hereditary and acquired methemoglobinemia	2016-04-08	2016	Secondary Indication	For treatment of pediatric and adult patients with acquired methemoglobinemia.	Hematology	S	drug
